# Supplementary material for: Multicentre survey of retinopathy of prematurity in Indonesia
Source: PubMed Central journal article supplement (PMC7831712; doi:10.1136/bmjpo-2020-000761), 2021-01-22
Supplement: bmjpo-2020-000761.draft_revisions.pdf [file bmjpo-2020-000761.draft_revisions.pdf]

# BMJ Paediatrics Open

BMJ Paediatrics Open is committed to open peer review. As part of this commitment we make the peer review history of every article we publish publicly available.

When an article is published we post the peer reviewers' comments and the authors' responses online. We also post the versions of the paper that were used during peer review. These are the versions that the peer review comments apply to.

The versions of the paper that follow are the versions that were submitted during the peer review process. They are not the versions of record or the final published versions. They should not be cited or distributed as the published version of this manuscript.

BMJ Paediatrics Open is an open access journal and the full, final, typeset and author-corrected version of record of the manuscript is available on our site with no access controls, subscription charges or pay-per-view fees (<http://bmjpaedsopen.bmj.com>).

If you have any questions on BMJ Paediatrics Open's open peer review process please email [info.bmjpo@bmj.com](mailto:info.bmjpo@bmj.com)

# BMJ Paediatrics Open

## Indonesian Multicenter Study of ROP, a survey in 34 hospitals

|                               |                                                                                                                                                                                                                                                                                                                                                                                                                                                                                                                                                                                                                                                                                                                                                                                                                                   |
|-------------------------------|-----------------------------------------------------------------------------------------------------------------------------------------------------------------------------------------------------------------------------------------------------------------------------------------------------------------------------------------------------------------------------------------------------------------------------------------------------------------------------------------------------------------------------------------------------------------------------------------------------------------------------------------------------------------------------------------------------------------------------------------------------------------------------------------------------------------------------------|
| Journal:                      | <i>BMJ Paediatrics Open</i>                                                                                                                                                                                                                                                                                                                                                                                                                                                                                                                                                                                                                                                                                                                                                                                                       |
| Manuscript ID                 | bmjpo-2020-000761                                                                                                                                                                                                                                                                                                                                                                                                                                                                                                                                                                                                                                                                                                                                                                                                                 |
| Article Type:                 | Original research                                                                                                                                                                                                                                                                                                                                                                                                                                                                                                                                                                                                                                                                                                                                                                                                                 |
| Date Submitted by the Author: | 18-Jun-2020                                                                                                                                                                                                                                                                                                                                                                                                                                                                                                                                                                                                                                                                                                                                                                                                                       |
| Complete List of Authors:     | Siswanto, J; Rumah Sakit Anak dan Bunda Harapan Kita, Dep. Neonatology; Pelita Harapan University Faculty of Medicine, Pediatric<br>Bos, Arend F.; University Medical Center Groningen Intensive Care Medicine, Neonatology<br>Dijk, Peter; Universitair Medisch Centrum Groningen, Neonatology<br>Rohsiswatmo, Rinawati ; University of Indonesia Faculty of Medicine, Pediatric<br>Irawan, Gatot; Dr Kariadi General Hospital Medical Center, Pediatric<br>Sulistijono, Eko; Dr Saiful Anwar General Hospital, Pediatric<br>Sianturi, Pertin; University of Sumatera Utara Faculty of Medicine, Pediatric<br>Wisnumurti, Dewi; University of Riau Faculty of Medicine, Pediatric<br>Wilar, Rocky; Sam Ratulangi University Faculty of Medicine, Pediatric<br>Sauer, Pieter; Universitair Medisch Centrum Groningen, Neonatology |
| Keywords:                     | Neonatology, Ophthalmology, Epidemiology, Mortality, Health services research                                                                                                                                                                                                                                                                                                                                                                                                                                                                                                                                                                                                                                                                                                                                                     |
|                               |                                                                                                                                                                                                                                                                                                                                                                                                                                                                                                                                                                                                                                                                                                                                                                                                                                   |

SCHOLARONE™  
Manuscripts

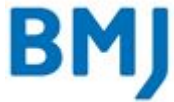

I, the Submitting Author has the right to grant and does grant on behalf of all authors of the Work (as defined in the below author licence), an exclusive licence and/or a non-exclusive licence for contributions from authors who are: i) UK Crown employees; ii) where BMJ has agreed a CC-BY licence shall apply, and/or iii) in accordance with the terms applicable for US Federal Government officers or employees acting as part of their official duties; on a worldwide, perpetual, irrevocable, royalty-free basis to BMJ Publishing Group Ltd ("BMJ") its licensees and where the relevant Journal is co-owned by BMJ to the co-owners of the Journal, to publish the Work in this journal and any other BMJ products and to exploit all rights, as set out in our [licence](#).

The Submitting Author accepts and understands that any supply made under these terms is made by BMJ to the Submitting Author unless you are acting as an employee on behalf of your employer or a postgraduate student of an affiliated institution which is paying any applicable article publishing charge ("APC") for Open Access articles. Where the Submitting Author wishes to make the Work available on an Open Access basis (and intends to pay the relevant APC), the terms of reuse of such Open Access shall be governed by a Creative Commons licence – details of these licences and which [Creative Commons](#) licence will apply to this Work are set out in our licence referred to above.

Other than as permitted in any relevant BMJ Author's Self Archiving Policies, I confirm this Work has not been accepted for publication elsewhere, is not being considered for publication elsewhere and does not duplicate material already published. I confirm all authors consent to publication of this Work and authorise the granting of this licence.

1  
2  
3 **Title:** Indonesian Multicenter Study of ROP, a survey in 34 hospitals  
4

5 **First Author/Corresponding Author:** J. Edy Siswanto  
6

7 **Corresponding Author's Institution:**  
8

9 Department of Neonatology, Harapan Kita Women and Children Hospital  
10

11 **Postal Address:**  
12

13 Rumah Sakit Anak dan Bunda Harapan Kita  
14

15 Jl. Letjen S. Parman Kav. 87  
16

17 Jakarta Barat, DKI Jakarta, ID 11420  
18

19 Indonesia  
20

21 **E-mail:** edyjo15@yahoo.com, edy.jos@gmail.com  
22

23 **Telephone number :** +62215668284 and +6287786293779  
24

25 **Fax number :** +62215657547  
26

27 **Keywords.** Retinopathy of Prematurity, incidence, mortality  
28

29 **Word count:** 2239  
30

31 **Running title:** Incidence of ROP, mortality, Indonesia  
32  
33  
34  
35  
36  
37  
38  
39  
40  
41  
42  
43  
44  
45  
46  
47  
48  
49  
50  
51  
52  
53  
54  
55  
56  
57  
58  
59  
60

## Indonesian Multicenter Study of ROP, a survey in 34 hospitals

J. Edy Siswanto<sup>1a, b</sup>, Arend F. Bos<sup>2</sup>,  
Peter Dijk<sup>2</sup>, Rinawati Rohsiswatmo<sup>3</sup>, Gatot Irawan<sup>4</sup>, Eko Sulistijono<sup>5</sup>, Pertin Sianturi<sup>6</sup>,  
Dewi A. Wisnumurti<sup>7</sup>, Rocky Wilar<sup>8</sup>,  
Pieter JJ Sauer<sup>2</sup>, for the IMSROP study group\*

### Author information

<sup>1a</sup>Neonatology Working Group, Department of Pediatrics, Harapan Kita Women and Children Hospital, Jakarta, Indonesia

<sup>1b</sup>Faculty of Medicine Pelita Harapan University, Tangerang

<sup>2</sup>Department of Pediatrics, Beatrix Children's Hospital, University Medical Center Groningen, Groningen, The Netherlands

<sup>3</sup>Department of Pediatrics, Faculty of Medicine University of Indonesia, Rumah Sakit Cipto Mangunkusumo, Jakarta

<sup>4</sup>Department of Pediatrics, Faculty of Medicine Diponegoro University, RSUP Dr. Kariadi, Semarang, Central Java

<sup>5</sup>Department of Pediatrics, RSUD Dr. Syaiful Anwar, Faculty of Medicine Brawijaya University Malang, East Java

<sup>6</sup>Department of Pediatrics, Faculty of Medicine University Sumatera Utara (USU), RSUP H. Adam Malik, Medan, North Sumatera

<sup>7</sup>Department of Pediatrics, RSUD Arifin Achmad Pekanbaru, Faculty of Medicine Riau University

<sup>8</sup>Department of Pediatrics, RSUP Prof. Dr. RD Kandou Hospital, Faculty of Medicine Sam Ratulangi University, Manado, North Sulawesi

### Abstract

**Background** In previous surveys, a higher incidence of Retinopathy of Prematurity (ROP) was found in Indonesia compared with developed countries. A new protocol on how to prevent, screen, and treat ROP was introduced in 2010 to try to reduce the incidence. Thereafter focus meetings were held. National Health Insurance was introduced in 2014.

**Objective** To evaluate whether the introduction of the guidelines, attention to the high incidence of ROP and national health insurance might have influenced the incidence of ROP in Indonesia.

**Setting** Data were collected from 34 hospitals with different levels of care, National Referral Centers, University-based Hospitals, Government, and Private Hospitals.

1  
2  
3 Methods A questionnaire was send asking the number of admissions, mortality rate,  
4 incidence, and the stage of ROP, disaggregated by gestational age and birth weight. Data were  
5  
6 asked for the years 2016-2017.  
7  
8

9  
10 **Results** We identified 12,115 eligible infants with a gestational age of less than 34 weeks.  
11  
12 Mortality was 24%, any stage ROP 6.7%. The mortality in infants of less than 28 weeks was  
13  
14 67%, the incidence of all stage ROP 18%, and severe ROP 4%. In the group 28-32 weeks, the  
15  
16 mortality was 24%, all stage ROP 7%, and severe ROP 4-5%. Mortality, as well as the incidence  
17  
18 of ROP, was highest in the University-based hospitals.  
19  
20

21  
22 **Conclusions** The mortality rate in infants born before 32 weeks is higher in Indonesia in the  
23  
24 period 2016-2017 compared to developed countries. The incidence of ROP is comparable to  
25  
26 rates found in developed countries. The incidence of ROP in Indonesia might be an  
27  
28 underestimation due to the high mortality. The incidence of ROP in 2016-2017 is lower  
29  
30 compared to surveys done before 2015. The reduction in the incidence of ROP in Indonesia  
31  
32 might be due to higher awareness about ROP among practitioners and the introduction of a  
33  
34 national health care system.  
35  
36  
37  
38  
39  
40  
41  
42  
43  
44

## 45 **Introduction**

46  
47 Studies done on the incidence of Retinopathy of Prematurity (ROP) during the period 2005-  
48  
49 2015 in Indonesia showed a relatively high incidence of ROP.<sup>1,2</sup> Moreover, ROP was also seen  
50  
51 in infants with gestational ages above 32 weeks. In view of these findings, a group of  
52  
53 neonatologists and ophthalmologists came together in 2009 and 2010 to develop a guideline  
54  
55 for early ROP detection and management for neonatologists and ophthalmologists in  
56  
57 Indonesia. This guideline consists of advice on how to prevent ROP and how and when to  
58  
59  
60

1  
2  
3 screen newborn infants. The guideline recommends screening all infants born before 34  
4  
5 weeks or with a birthweight less than 1500 grams, and infants of higher gestational age and  
6  
7 higher birth weight who received oxygen for a prolonged time. The national guideline was  
8  
9 published in 2010.<sup>3</sup> The introduction of the guideline did not result in national  
10  
11 implementation. This is most likely due to a lack of pediatricians' and ophthalmologists'  
12  
13 knowledge about ROP and financial constraints in hospitals. Therefore, after the 2010 era,  
14  
15 several meetings were organized by the Pediatric and Ophthalmologist Societies in Indonesia  
16  
17 to make neonatologists and ophthalmologists aware of the high incidence of ROP, of ways to  
18  
19 prevent ROP, and how to perform the screening procedures. Secondly, in 2014 a national  
20  
21 health insurance was introduced in Indonesia which increased the possibility of treating  
22  
23 premature infants and improving screening for ROP. The care for preterm infants is given in  
24  
25 Indonesia in two national referral centers, university-based NICU's as well as Governmental  
26  
27 and Private Hospitals. There is a marked variation between the options to care for sick  
28  
29 preterm infants between these hospitals. It is not known if these differences between  
30  
31 hospitals result in a different incidence of ROP.  
32  
33  
34  
35  
36  
37  
38  
39

40 In order to evaluate whether the attention asked for the high incidence of ROP in Indonesia  
41  
42 and the national health insurance might have reduced the incidence of ROP in Indonesia we  
43  
44 conducted a survey on the incidence of ROP in neonatal intensive care centers and local  
45  
46 hospitals in Indonesia in the years 2016-2017. As the incidence might be different between  
47  
48 hospitals, we collected data from all levels of hospitals where care for sick newborn infants is  
49  
50 given.  
51  
52  
53

## 54 **Methods.**

55  
56  
57  
58  
59  
60

1  
2  
3 A questionnaire was sent to the national referral centers for perinatology, university-based  
4 neonatal intensive care centers as well as government and private hospitals. In total 34  
5  
6 hospitals were invited to participate in this survey. In the questionnaire, we asked for the  
7  
8 following data: number of inborn preterm infants, number of preterm infants that died in the  
9  
10 perinatal period, number of infants screened for ROP, number of infants with ROP, and the  
11  
12 stage of ROP. For all data, we asked to specify the data according to gestational age and birth  
13  
14 weight. For the analysis, we combined the university-based hospitals and the district  
15  
16 (government)/private hospitals in two separate groups. The data for the two national referral  
17  
18 perinatal centers are shown separately.  
19  
20  
21  
22  
23  
24  
25

### 26 **Patient involvement**

27  
28 Patients or the public were not involved in the design, or conduct, or reporting, or  
29  
30 dissemination plans of our research  
31  
32  
33

### 34 **Results.**

35  
36 We received data from the two national referral hospitals for perinatology (Harapan Kita  
37  
38 Women and Children Health Center and RSCM- Ciptomangunkusumo Hospital), 14 University  
39  
40 Based Hospital NICU'S, and 18 other hospitals, which included 11 government hospitals and  
41  
42 7 private hospitals (table 1).  
43  
44  
45  
46  
47

48 We received in total data on 12.115 infants with a gestational age <34 weeks. 5252 Infants  
49  
50 had a birth weight of less than 1500 g. The overall mortality of infants <34 weeks was 24.1%.  
51  
52 Almost 37% of surviving infants were screened for ROP, the incidence of all stage ROP was  
53  
54 6.7%. The highest incidence of both mortality and ROP was found in the University-Based  
55  
56 Hospitals (table 1). In table 2 the data are shown for each -group of- hospitals according to  
57  
58  
59  
60



1  
2  
3 gestational age. The overall mortality in the group <28 weeks was 67% without differences  
4 between -groups of- hospitals. Sixty-three percent of surviving infants were screened for ROP,  
5  
6 the rate of screening varied from 93% in one referral hospital to 42% in the group of other  
7  
8 hospitals. The overall rate of any stage ROP was 18%, severe ROP 4%. The incidence of both  
9  
10 any stage ROP and severe ROP was higher in the university-based NICU'S and other hospitals  
11  
12 compared to both national centers (18-21% vs 4-8%) (figure 1). Severe ROP was not seen in  
13  
14 the national centers, while it was seen in 4 and 5% of infants in the university and other  
15  
16 hospitals. The same trend was found in infants born after 28-32 weeks. Overall mortality in  
17  
18 this group was 24%, with the highest mortality in the university hospitals (31%) compared  
19  
20 with 11% in one of the national centers. The rate of screening in the group 28-32 weeks was  
21  
22 lower compared to the group <28 weeks, 41 vs 63% and varied between 86% in one national  
23  
24 center to 19% in the group other hospitals. Any stage ROP was found in 7% of surviving  
25  
26 infants, with the highest incidence (11%) in the university hospitals and 1-2% in the other  
27  
28 hospitals. The incidence of severe ROP was 0-1% in all hospitals. The mortality in the group  
29  
30 32-34 weeks was on average 14% with no important differences between hospitals. The rate  
31  
32 of screening in these infants was 32%, the prevalence of any stage ROP in this group was 4%,  
33  
34 with the highest incidence in university-based hospitals.

35  
36  
37 In the supplementary table, the data are shown for each -group of- hospitals according to  
38  
39 birth weight. The overall mortality in the group <1000 gram was 61% without differences  
40  
41 between -groups of- hospitals. Forty-six percent of surviving infants were screened for ROP,  
42  
43 the rate of screening varied from 88% in one referral hospital to 33% in the group of other  
44  
45 hospitals. The overall rate of any stage ROP was 18%, severe ROP 3%. The incidence of both  
46  
47 any stage ROP and severe ROP was higher in the university-based NICU'S and other hospitals  
48  
49 compared to both national centers (20% vs 8-10%). Severe ROP was not seen in the national  
50  
51  
52  
53  
54  
55  
56  
57  
58  
59  
60

1  
2  
3 centers, while it was seen in 3 and 6% of infants in the university and other hospitals. The  
4  
5 same trend was found in infants born after 1000-1500 grams. Overall mortality in this group  
6  
7 was 30%, with the highest mortality in the university and other hospitals (30%) compared  
8  
9 with 15% in one of the national centers. The rate of screening in the group 1000-1500 gram  
10  
11 was higher compared to the group <1000 gram, 55 vs 46%, and varied between 90% in one  
12  
13 national center to 36% in the group other hospitals. Any stage ROP was found in 8% of  
14  
15 surviving infants, with the highest incidence (13%) in the university hospitals and 3% in the  
16  
17 other hospitals. The incidence of severe ROP was 1% in all hospitals. The mortality in the group  
18  
19 >1500-2000 gram was on average 12% with no important differences between hospitals. The  
20  
21 rate of screening in these infants was 33%, the prevalence of any stage ROP in this group was  
22  
23 3%, with the highest incidence in university-based hospitals (5%).  
24  
25  
26  
27  
28  
29

30  
31 In order to evaluate if the rate of screening might have affected the incidence of ROP found  
32  
33 in our survey, we calculated the incidence of ROP in 13 out of the 34 hospitals where at least  
34  
35 80% of infants were screened once or more (table 3). There was no difference in the rate of  
36  
37 ROP between these hospitals and the total group. In the <28 weeks group, the ROP rate for  
38  
39 all stages was 21% and 5% for severe ROP. In the 28-32 weeks group, the incidence of all ROP  
40  
41 stages was 6%, severe ROP 1%.  
42  
43  
44  
45

#### 46 **Discussion.**

47  
48  
49 In this survey conducted in 2016-2017, we found that the incidence of any stage ROP in infants  
50  
51 born <28 weeks in Indonesia was 18% and 7% in the 28-32 weeks group. The incidence of  
52  
53 severe ROP was 4% in the <28 weeks group and 1% in the 28-32 weeks group. The incidence  
54  
55 of ROP in Indonesia in the period 2016-2017 is much lower compared to the incidence we  
56  
57 found in 2005-2015. We found in this period in one NICU an incidence of all stage ROP of 40%  
58  
59  
60

1  
2  
3 in infants below 28 weeks and 28% in the group 28-32 weeks.<sup>1</sup> Other studies from this period  
4  
5 in Indonesia found in infants born before 32 weeks and/or with a birth weight of less than  
6  
7 1500 gram a ROP incidence of 18-30%.<sup>2</sup> Different factors might have contributed to this  
8  
9 marked decrease in ROP. First, a national guideline for the prevention and screening of ROP  
10  
11 in Indonesia was published in 2009. When we realized that only publishing this guideline did  
12  
13 not change the practice in Indonesia, several focus meetings were held all over Indonesia to  
14  
15 ask the attention of practitioners for the high incidence of ROP in Indonesia, the methods to  
16  
17 prevent ROP, and the importance of screening.<sup>3</sup> Secondly, in 2014 a national health insurance  
18  
19 plan was introduced in Indonesia, improving the possibilities for treating and screening  
20  
21 preterm infants. We cannot differentiate which of these factors might have had the most  
22  
23 impact on the decrease in the incidence of ROP.  
24  
25  
26  
27  
28  
29

30  
31 It is difficult to compare the incidence of ROP in Indonesia to the incidence reported in  
32  
33 developed countries. A recent study from Greece showed an incidence of any stage ROP in  
34  
35 infants <32 weeks of 19.7%, severe ROP 7.4%.<sup>4</sup> In the EXPRESS study from Sweden, the  
36  
37 incidence of any stage ROP in infants <31 weeks of 31.9% was found, severe ROP in 5.7%.<sup>5</sup>  
38  
39 There is a marked difference, however, between Indonesia and developed countries in the  
40  
41 type of infants cared for and the survival of these infants. In Indonesia, almost no infants born  
42  
43 after a gestational age of 26 weeks or less, will survive. The mortality in infants of 26-28 weeks  
44  
45 in Indonesia is much higher compared to developed countries. In our survey, we found that  
46  
47 67% of infants born <28 weeks, died. Recent data from Sweden, England, France, the  
48  
49 Netherlands, Canada, and the USA show the survival of infants born between 26-28 weeks of  
50  
51 80-90%.<sup>6-16</sup> In Indonesia, only the healthier very preterm infants will survive. In these infants,  
52  
53 the incidence of ROP might be lower than in the very sick newborns, who died. The same  
54  
55 might be true for infants born after 28-32 weeks. We found that, in Indonesia, 24% of these  
56  
57  
58  
59  
60

1  
2  
3 infants died. In developed countries, this percentage is less than 5%. It might well be that the  
4  
5 present data on the incidence of ROP in Indonesia is an underestimation caused by the higher  
6  
7 death rate in Indonesia.  
8  
9

10  
11 Another reason for an underestimation of the true incidence might be the rather low rate of  
12  
13 screening. We found however no difference in the incidence of ROP in the institutions with a  
14  
15 rate of screening of at least 80%, compared to the whole group of infants. The follow-up of  
16  
17 preterm infants admitted to a NICU is in Indonesia, due to socio-economic factors, low. It is  
18  
19 not known therefore if ROP was present in surviving, not screened infants. The low rate of  
20  
21 screening is due to a lack of ophthalmologists trained in ROP screening.  
22  
23  
24  
25

26  
27 The incidence of ROP in Harapan Kita Women and Children Hospital was significantly lower in  
28  
29 the period 2016-2017 compared to the period 2005-2015. At the same time, the rate of  
30  
31 screening improved to 93%. This indicates that ROP decreased significantly in this hospital. In  
32  
33 2016 a strict policy was introduced to set the oxygen saturation monitor for preterm infants  
34  
35 between 91% and 95%. The use of oxygen in the delivery room was also strictly regulated,  
36  
37 resuscitation of preterm infants was done with in principle 30% oxygen. CPAP was given  
38  
39 directly after birth and continued in the NICU. These measures have, most likely, been  
40  
41 important in reducing the incidence of ROP in this NICU.  
42  
43  
44  
45

46  
47 The highest rate of both mortality and ROP was found in the University-Based Hospitals.  
48  
49 University-Based Hospitals are referral hospitals, so they might treat the sickest infants, sicker  
50  
51 infants than cared for in governmental and private hospitals. This could explain the higher  
52  
53 mortality and higher rate of ROP. At the same time, however, the two national centers are  
54  
55 also referral hospitals and they showed a lower mortality rate and a lower incidence of ROP  
56  
57 (figure 1,2). So, there might be other factors causing the higher incidence of ROP in the  
58  
59  
60

1  
2  
3 University-Based Hospitals. More liberal use of oxygen might be a cause. More studies are  
4  
5  
6 needed to determine the cause of the less favorable outcome in the University-Based  
7  
8 Hospitals.  
9

10  
11 A limitation of this study is that the survey on the incidence of ROP as done in this study was  
12  
13 not done before. In this paper, we used data from one referral hospital as well as data  
14  
15 published in the literature as a reference. The rates of ROP found in one hospital in Indonesia<sup>1</sup>  
16  
17 as well as the studies done in other centers<sup>2</sup>, all showed a high incidence of ROP in the period  
18  
19 before 2015. Therefore, we are convinced that the incidence of ROP was indeed much higher  
20  
21 compared to the results found in this survey.  
22  
23  
24  
25

## 26 **Conclusion.**

27  
28  
29 The incidence of ROP in preterm infants in Indonesia was lower in 2016-2017 compared to  
30  
31 the period before 2015. This might be due to a higher awareness of ROP among practitioners  
32  
33 and to the introduction of a national health care system. Our data, however, might be an  
34  
35 underestimation of the real incidence of ROP due to the higher mortality rate in small preterm  
36  
37 infants in Indonesia compared to developed countries.  
38  
39  
40  
41  
42  
43  
44  
45  
46  
47  
48

49 **Acknowledgements** The authors would like to thank all infants and families whose data  
50  
51 contribute to the IMSROP Study Group. We thank Dr. Florence Manurung, Dr. Habsyiyah, and  
52  
53 Dr. Nani H. Widodo, as well as all the ophthalmology colleagues involved in each hospital  
54  
55 included in this study, were involved in examining patients and providing scientific input in  
56  
57 the field of ophthalmology and Prof. Rita S. Sitorus who encouraged us to move hand in hand  
58  
59  
60

1  
2  
3 together to reduce the incidence of ROP in Indonesia in terms of neonatology,  
4  
5 ophthalmology, and public health.  
6  
7

### 8 9 **Collaborators**

10  
11 \*Members of the IMSROP (Indonesian Multicenter Retinopathy of Prematurity) Study Group:  
12 Rinawati Rohsiswatmo (*Rumah Sakit Cipto Mangunkusumo, Jakarta Pusat*), Tetty Yuniati  
13 (*RSUP Hasan Sadikin, Bandung, Jawa Barat*), Gatot Irawan Sarosa (*RSUP dr. Kariadi,*  
14 *Semarang, Jawa Tengah*), Dwi Hidayah (*RSUD Dr. Moewardi, Solo, Jawa Tengah*), Dina  
15 Angelika dan Risa Etika (*RSUD Dr. Soetomo Surabaya, Jawa Timur*), Eko Sulistijono (*RSUD Dr.*  
16 *Syaiful Anwar Malang, Jawa Timur*), Made Kardana (*RSUP Sanglah, Denpasar, Bali*), Pertin  
17 Sianturi (*RSUP H. Adam Malik, Medan, Sumatera Utara*), Eni Yantri (*RSUP Dr. M. Djamil*  
18 *Padang, Sumatera Barat*), Dewi Anggraini Wisnumurti (*RSUD Arifin Achmad Pekanbaru, Riau*),  
19 Afifa Ramadanti (*RSUP M. Hoesin Palembang, Sumatera Selatan*), Pudji Andayani (*RSUD Ulin*  
20 *Banjarmasin Kalimantan Selatan*), Rocky Wilar (*RSUP Prof. dr. RD Kandou Hospital, Manado*),  
21 Ema Alasiry (*RSUP Dr. Wahidin Sudirohusodo, Makasar, Sulawesi Selatan*), Harris Alfian (*RS*  
22 *Atma Jaya, Jakarta Utara*), Johanes Edy Siswanto (*RSAB Harapan Kita dan RS Royal Taruma,*  
23 *Jakarta Barat*), Naomi Esthernita (*Siloam Hospital Kebon Jeruk, Jakarta Barat*), Fahrul Wakil  
24 Arbi (*RS Budi Kemuliaan, Jakarta Pusat*), Nita Dewanti (*RS Premier Bintaro, Jakarta Selatan*),  
25 Agnes Yuni Purwita Sari (*RSUP Persahabatan, Jakarta Timur*), Ellen Sianipar (*RSUD Pasar Rebo*  
26 *Jakarta Timur*), Robert Soetandio (*RS Awal Bros Hospital, Tangerang, Jawa Barat*), Andika  
27 Tiurmaida (*RSUD Cibinong, Jawa Barat*), Thomas Harry Adoe (*RSUD Kota Bekasi*), Muda Isa  
28 Ariantana (*Santosa Hospital Bandung Cermat Bandung, Jawa Barat*), Samad (*RSUP Dr.*  
29 *Soeradji Tirtonegoro Klaten*), Anince (*RS Bakti Timah Karimun, Kepulauan Riau*), Tri Putri  
30 Yuliani (*RSUD Siti Aisyah Kota Lubuk Linggau*), Sumsel, Dina Frida (*RSUD Dr. Sudarso,*  
31 *Kalimantan Barat dan RS Anugrah Bunda Khatulistiwa, Kalimantan Barat*), Nurhandini Eka  
32 Dewi (*RSUD Mataram, Nusa Tenggara Barat*), Woro Indri P. Purba (*RSUD Prof. Dr. WZ*  
33 *Johannes Kupang, Nusa Tenggara Timur*), Sadiyah (*RSUD I Lagaligo, Luwu Timur, Sulawesi*  
34 *Selatan*).  
35  
36  
37  
38  
39  
40  
41  
42  
43  
44  
45

46 **Contributors** JES is the person who involved directly in whole aspects of this research and  
47 manuscript. JES, AB, PD, and PJJS contributed to study design and analysis. PJJS assisted in the  
48 literature review, wrote the report, and wrote the discussion section. AFB and PJJS are the  
49 guarantors for the study. JES, AB, and PJJS had full access to the IMSROP data. All authors had  
50 full access to the summary data presented in this paper (including statistical reports and  
51  
52  
53  
54  
55  
56  
57  
58  
59  
60

1  
2  
3 tables) in the study and can take responsibility for the integrity of the data and the accuracy  
4  
5 of the data analysis.  
6  
7

8  
9 **Funding** The authors have not declared a specific grant for this research from any funding  
10  
11 agency in the public, commercial, or not-for-profit sectors.  
12  
13

14 **Competing interests** None declared.  
15  
16

17 **Patient consent** Detail has been removed from this case description/these case descriptions  
18  
19 to ensure anonymity. The editors and reviewers have seen the detailed information available  
20  
21 and are satisfied that the information backs up the case the authors are making.  
22  
23

24  
25 **Ethics approval** The study was approved by the Institutional Review Board of the University  
26  
27 of Indonesia School of Public Health (No. 32/H2.F10/PPM.00/13)  
28  
29

30  
31 **Provenance and peer review** Not commissioned; externally peer-reviewed.  
32  
33

34  
35  
36  
37 What is already known on this topic?  
38  
39

40  
41 ► Several studies in the previous decade in Indonesia showed a high incidence of ROP which  
42  
43 is a serious problem as in other LMIC countries.  
44  
45

46  
47 ► The high rate of ROP in Indonesia is most likely due to an expansion of neonatal intensive  
48  
49 care while the awareness of the risks to develop ROP is lacking.  
50  
51

52 What this study adds?  
53  
54

55  
56 ► The incidence of ROP in Indonesia was lower in 2016-2017 compared to surveys conducted  
57  
58 before 2015.  
59  
60



1  
2  
3 ▶ There is a difference in mortality and rate of ROP between the types of hospitals. Mortality,  
4 as well as the incidence of ROP, was highest in University-based hospitals.  
5  
6

7  
8 ▶ The lower rate of ROP might be the result of a new national guideline on ROP, of an  
9 increased awareness due to focus meetings and the introduction of national health care.  
10  
11  
12

## 13 14 15 16 17 18 19 20 21 22 23 24 25 26 27 28 29 30 31 32 33 34 35 36 37 38 39 40 41 42 43 44 45 46 47 48 49 50 51 52 53 54 55 56 57 58 59 60

### References

1. Siswanto JE, Nani H Widodo NH, Sauer PJJ. *Arch Dis Child* 2018;103:619–21.
2. Siswanto JE, Sauer PJ. Retinopathy of prematurity in Indonesia: Incidence and riskfactors. *J Neonatal Perinatal Med* 2017;10:85–90.
3. Sitorus RS et al. POKJA Nasional ROP dan Bayi Prematur, Pedoman Nasional: Skrining dan Terapi ROP pada bayi prematur di Indonesia. eds 1. 2010
4. Mataftsi A, Moutzouri S, Karagianni P, et al. Retinopathy of prematurity occurrence and evaluation of screening policy in a large tertiary Greek cohort. *Int Ophthalmol* 2020;40:385-91
5. Austeng D, Källén K, Hellström A, et al. Regional differences in screening for retinopathy of prematurity in infants born before 27 weeks of gestation in Sweden--the EXPRESS study. *Acta Ophthalmol* 2014; 92:311-5.
6. Draper ES, Zeitlin J, Field DJ, et al. Mortality patterns among very preterm babies: A comparative analysis of two European regions in France and England. *Arch Dis Child Fetal Neonatal Ed* 2007; 92: 356–360.
7. Milligan DW. Outcomes of children born very preterm in Europe. *Arch Dis Child Fetal Neonatal Ed* 2010;95:F234-40.
8. Draper ES, Zeitlin J, Fenton AC, et al, on behalf of the MOSAIC research group. Investigating the variations in survival rates for very preterm infants in 10 European regions: the MOSAIC birth cohort. *Arch Dis Child Fetal Neonatal Ed* 2009;3:F158-63.
9. Mohangoo AD, Buitendijk SE, Szamotulska K, et al. Gestational Age Patterns of Fetal and Neonatal Mortality in Europe: Results from the Euro-Peristat Project. *PLoS ONE* 2011;6:e24727.
10. Serenius F, Sjörs G, Blennow M, et al, and For the EXPRESS study group\*. EXPRESS study shows significant regional differences in 1-year outcome of extremely preterm infants in Sweden. *Acta Paediatr* 2014;103:27–37.
11. Santhakumaran S, Statnikov Y, Gray D, et al, on behalf of the Medicines for Neonates Investigator Group. Survival of very preterm infants admitted to neonatal care in England 2008–2014: time trends and regional variation. *Arch Dis Child Fetal Neonatal Ed* 2018;103:F208–F215.



12. Norman M, Hallberg B, Abrahamsson T, et al. Association Between Year of Birth and 1-Year Survival Among Extremely Preterm Infants in Sweden During 2004-2007 and 2014-2016. *JAMA* 2019; 321:1188-1199.
13. Lee SK, McMillan DD, Ohlsson A, et al. Variations in practice and outcomes in the Canadian NICU network: 1996-1997. *Pediatrics* 2000;106:1070-9.
14. Stoll BJ, Hansen NI, Bell EF, et al. Neonatal Outcomes of Extremely Preterm Infants From the NICHD Neonatal Research Network. *Pediatrics* 2010; 126: 443-456.
15. Stoll BJ, Hansen NI, Bell EF, et al. Trends in Care Practices, Morbidity, and Mortality of Extremely Preterm Neonates, 1993-2012. *JAMA* 2015;314:1039-51.
16. Su BH, Hsieh WS, Hsu CH, Chang JH, Lien R, Lin CH; Premature Baby Foundation of Taiwan (PBFT). Neonatal Outcomes of Extremely Preterm Infants From Taiwan: Comparison With Canada, Japan, and the USA. *Pediatr Neonatol* 2015;56:46-52.

#### Figure legend

Figure 1. The prevalence of ROP based on gestational age in each group of the hospital in Indonesia 2016-2017.

Figure 2. Mortality based on the gestational age in each group of the hospital in Indonesia 2016-2017

**Table 1. Hospital-based ROP data surveillance in Indonesia 2016-2017 (GA ≤ 34 weeks)**

| Type of hospital      | Total Hospital | Total Infants | Survived | Died |       | Screened |       | ROP |      |
|-----------------------|----------------|---------------|----------|------|-------|----------|-------|-----|------|
|                       |                |               |          | n    | %     | n        | %     | n   | %    |
| RSCM/NRH              | 1              | 1038          | 890      | 148  | 14,26 | 392      | 44,04 | 7   | 1,79 |
| HKWCHC                | 1              | 478           | 392      | 86   | 17,99 | 281      | 71,68 | 7   | 2,49 |
| UBH                   | 14             | 6549          | 4738     | 1811 | 27,65 | 2041     | 43,08 | 197 | 9,65 |
| OH                    | 18             | 4050          | 3261     | 789  | 19,48 | 711      | 21,80 | 17  | 2,39 |
| - Government Hospital | 10             | 2155          | 1560     | 595  | 27,61 | 605      | 38,78 | 15  | 2,48 |
| - Private Hospital    | 8              | 1030          | 836      | 194  | 18,83 | 106      | 12,68 | 2   | 1,89 |
| All Hospital          | 34             | 12115         | 9281     | 2834 | 23,39 | 3425     | 36,90 | 228 | 6,66 |

Note:

RSCM/NRH: Ciptomangunkusumo Hospital (National Referral Hospital); HKWCH: Harapan Kita Women and Children Hospital (Health Centre); UBH: University Based Hospital; OH: Other Hospital; All: All Hospital; ROP; Retinopathy of Prematurity.

Table 2. ROP prevalence in Indonesia based on the gestational age in 2005-2017

| Variable                     |   | Inborn infants GA <28 weeks |           |       |     |     |      | Inborn infants GA 28 - 32 weeks |           |       |      |      |      | Inborn infants GA >32 - 34 weeks |           |       |      |      |      |
|------------------------------|---|-----------------------------|-----------|-------|-----|-----|------|---------------------------------|-----------|-------|------|------|------|----------------------------------|-----------|-------|------|------|------|
|                              |   | 2005-2015                   | 2016-2017 |       |     |     |      | 2005-2015                       | 2016-2017 |       |      |      |      | 2005-2015                        | 2016-2017 |       |      |      |      |
|                              |   | HKWCH                       | RSCM      | HKWCH | UBH | OH  | All  | HKWCH                           | RSCM      | HKWCH | UBH  | OH   | All  | HKWCH                            | RSCM      | HKWCH | UBH  | OH   | All  |
| <b>Total (Inborn)</b>        | n | 185                         | 115       | 54    | 903 | 354 | 1426 | 569                             | 501       | 221   | 2288 | 2044 | 5054 | NA                               | 422       | 203   | 3358 | 1652 | 5635 |
| <b>Died</b>                  | n | 91                          | 87        | 27    | 577 | 259 | 961  | 126                             | 122       | 24    | 700  | 349  | 1195 | -                                | 26        | 24    | 534  | 181  | 765  |
|                              | % | 49                          | 76        | 50    | 64  | 73  | 67   | 22                              | 24        | 11    | 31   | 17   | 24   | -                                | 6         | 12    | 16   | 11   | 14   |
| <b>Survived</b>              | n | 94                          | 28        | 27    | 326 | 95  | 465  | 443                             | 379       | 197   | 1588 | 1695 | 3859 | -                                | 396       | 179   | 2824 | 1471 | 4870 |
| <b>Screened</b>              | n | 47                          | 23        | 25    | 204 | 40  | 292  | 261                             | 187       | 169   | 923  | 315  | 1594 | 156                              | 182       | 87    | 914  | 356  | 1539 |
| <b>Screened/Survived</b>     | % | 50                          | 82        | 93    | 63  | 42  | 63   | 59                              | 49        | 86    | 58   | 19   | 41   | -                                | 46        | 49    | 32   | 24   | 32   |
| <b>No ROP</b>                | n | 28                          | 22        | 23    | 161 | 33  | 239  | 187                             | 185       | 167   | 751  | 309  | 1478 | 126                              | 178       | 84    | 441  | 352  | 1480 |
| <b>ROP 1-2</b>               | n | 9                           | 1         | 2     | 34  | 5   | 42   | 66                              | 2         | 1     | 94   | 6    | 103  | 29                               | 2         | 3     | 45   | 2    | 52   |
| <b>ROP 3-5</b>               | n | 10                          | 0         | 0     | 9   | 2   | 11   | 8                               | 0         | 1     | 12   | 0    | 13   | 1                                | 2         | 0     | 3    | 2    | 7    |
| <b>Prevalence Any ROP</b>    | % | 40                          | 4         | 8     | 21  | 18  | 18   | 28                              | 1         | 1     | 11   | 2    | 7    | 19                               | 2         | 3     | 5    | 1    | 3.8  |
| <b>Prevalence Severe ROP</b> | % | 21                          | 0         | 0     | 4   | 5   | 4    | 3                               | 0         | 1     | 1    | 0    | 1    | 1                                | 1         | 0     | 0    | 1    | 0.4  |

Note: RSCM/NRH: Ciptomangunkusumo Hospital (National Referral Hospital); HKWCH: Harapan Kita Women and Children Hospital (Health Centre); UBH: University Based Hospital; OH: Other Hospital; All: All Hospital; ROP; Retinopathy of Prematurity; GA: Gestational Age.

Table 3. Incidence of ROP in hospitals with 80% screening coverage in Indonesia, 2016-2017

| Variable                        |   | Birth weight |             |              |               |         | Gestational age |           |           |            |         |
|---------------------------------|---|--------------|-------------|--------------|---------------|---------|-----------------|-----------|-----------|------------|---------|
|                                 |   | <1000 g      | 1000-1500 g | >1500-2000 g | >2000-<2500 g | ≥2500 g | <28 wks         | 28-32 wks | 32-34 wks | 34-<37 wks | ≥37 wks |
| <b>Total (Inborn)</b>           | n | 585          | 1541        | 2679         | 4522          | 20572   | 560             | 2144      | 2319      | 3913       | 20963   |
| <b>Died</b>                     | n | 394          | 449         | 303          | 163           | 266     | 391             | 508       | 244       | 165        | 267     |
|                                 | % | 67           | 29          | 11           | 4             | 1       | 70              | 24        | 11        | 4          | 1       |
| <b>Survived</b>                 | n | 191          | 1092        | 2376         | 4359          | 20306   | 169             | 1636      | 2075      | 3748       | 20696   |
| <b>Screened</b>                 | n | 172          | 1040        | 1033         | 1186          | 14      | 168             | 1147      | 926       | 1199       | 5       |
| <b>Screened/Survived</b>        | % | 90           | 95          | 43           | 27            | 0       | 99              | 70        | 45        | 32         | 0       |
| <b>No ROP</b>                   | n | 137          | 966         | 978          | 1159          | 14      | 132             | 1074      | 874       | 1169       | 5       |
| <b>ROP 1-2</b>                  | n | 28           | 57          | 53           | 27            | 0       | 27              | 62        | 46        | 30         | 0       |
| <b>ROP 3-5</b>                  | n | 7            | 17          | 2            | 0             | 0       | 9               | 11        | 6         | 0          | 0       |
| <b>Prevalence of Any ROP</b>    | % | 20           | 7           | 5            | 2             | 0       | 21              | 6         | 6         | 3          | 0       |
| <b>Prevalence of Severe ROP</b> | % | 4            | 2           | 0            | 0             | 0       | 5               | 1         | 1         | 0          | 0       |

Note : ROP: Retinopathy of Prematurity

1  
2  
3  
4  
5  
6  
7  
8  
9  
10  
11  
12  
13  
14  
15  
16  
17  
18  
19  
20  
21  
22  
23  
24  
25  
26  
27  
28  
29  
30  
31  
32  
33  
34  
35  
36  
37  
38  
39  
40  
41  
42  
43  
44  
45  
46  
47  
48  
49  
50  
51  
52  
53  
54  
55  
56  
57  
58  
59  
60

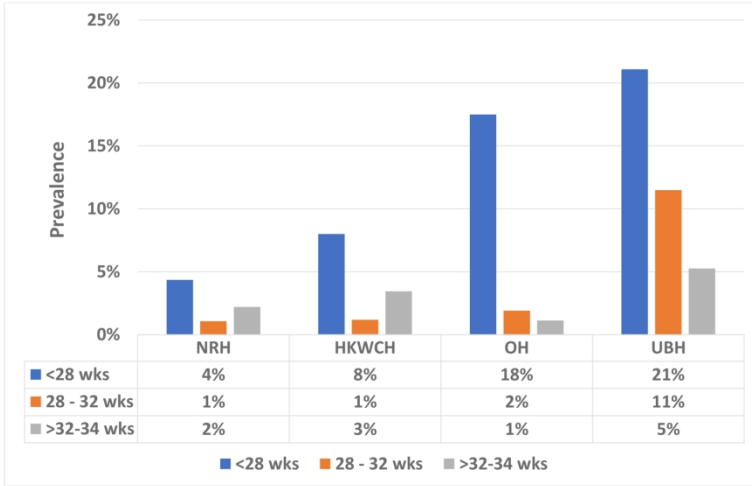

Note: RSCM/NRH: Ciptomangunkusumo Hospital (National Referral Hospital); HKWCH: Harapan Kita Women and Children Hospital (Health Centre); UBH: University Based Hospital; OH: Other Hospital.

148x105mm (1200 x 1200 DPI)

1  
2  
3  
4  
5  
6  
7  
8  
9  
10  
11  
12  
13  
14  
15  
16  
17  
18  
19  
20  
21  
22  
23  
24  
25  
26  
27  
28  
29  
30  
31  
32  
33  
34  
35  
36  
37  
38  
39  
40  
41  
42  
43  
44  
45  
46  
47  
48  
49  
50  
51  
52  
53  
54  
55  
56  
57  
58  
59  
60

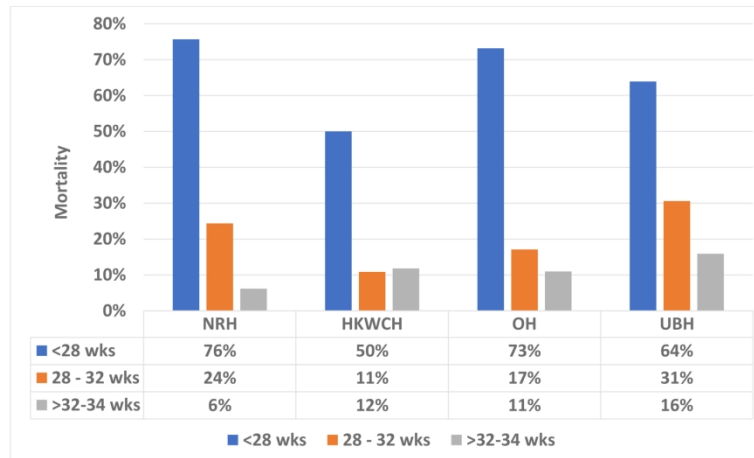

Note: RSCM/NRH: Ciptomangunkusumo Hospital (National Referral Hospital); HKWCH: Harapan Kita Women and Children Hospital (Health Centre); UBH: University Based Hospital; OH: Other Hospital.

148x105mm (1200 x 1200 DPI)

Supplementary Table. Prevalence of ROP in Indonesia based on the birth weight in 2005-2017

| Variable              |   | Inborn infants BW <1000 gram |           |       |      |     |      | Inborn infants BW 1000 - 1500 gram |           |       |      |      |      | Inborn infants BW >1500 - 2000 gram |           |       |      |      |      |
|-----------------------|---|------------------------------|-----------|-------|------|-----|------|------------------------------------|-----------|-------|------|------|------|-------------------------------------|-----------|-------|------|------|------|
|                       |   | 2005-2015                    | 2016-2017 |       |      |     |      | 2005-2015                          | 2016-2017 |       |      |      |      | 2005-2015                           | 2016-2017 |       |      |      |      |
|                       |   | HKWCH                        | RSCM      | HKWCH | UBH  | OH  | All  | HKWCH                              | RSCM      | HKWCH | UBH  | OH   | All  | HKWCH                               | RSCM      | HKWCH | UBH  | OH   | All  |
| Total (Inborn)        | n | 182                          | 132       | 71    | 1024 | 361 | 1588 | 437                                | 306       | 160   | 2104 | 1094 | 3664 | 748                                 | 475       | 236   | 3730 | 2055 | 6496 |
| Died                  | n | 85                           | 101       | 38    | 567  | 256 | 962  | 72                                 | 93        | 24    | 640  | 346  | 1103 | .                                   | 42        | 24    | 532  | 205  | 803  |
|                       | % | 47                           | 77        | 54    | 55   | 71  | 61   | 16                                 | 30        | 15    | 30   | 32   | 30   | .                                   | 9         | 10    | 14   | 10   | 12   |
| Survived              | n | 97                           | 31        | 33    | 457  | 105 | 626  | 365                                | 213       | 136   | 1464 | 748  | 2561 | .                                   | 433       | 212   | 3198 | 1850 | 5693 |
| Screened              | n | 59                           | 26        | 29    | 197  | 35  | 287  | 252                                | 169       | 123   | 802  | 273  | 1413 | 163                                 | 177       | 54    | 1131 | 495  | 1857 |
| Screened/Survived     | % | 61                           | 84        | 88    | 43   | 33  | 46   | 69                                 | 79        | 90    | 55   | 36   | 55   | .                                   | 41        | 25    | 35   | 27   | 33   |
| No ROP                | n | 27                           | 24        | 26    | 156  | 28  | 234  | 172                                | 167       | 120   | 696  | 265  | 1248 | 139                                 | 175       | 53    | 488  | 492  | 1208 |
| ROP 1-2               | n | 22                           | 2         | 2     | 33   | 5   | 42   | 71                                 | 1         | 3     | 89   | 7    | 100  | 22                                  | 1         | 1     | 54   | 2    | 58   |
| ROP 3-5               | n | 10                           | 0         | 1     | 6    | 2   | 9    | 9                                  | 1         | 0     | 17   | 1    | 19   | 2                                   | 1         | 0     | 0    | 1    | 2    |
| Prevalence Any ROP    | % | 54                           | 8         | 10    | 20   | 20  | 18   | 32                                 | 1         | 2     | 13   | 3    | 8    | 15                                  | 1         | 2     | 5    | 1    | 3    |
| Prevalence Severe ROP | % | 17                           | 0         | 3     | 3    | 6   | 3    | 4                                  | 1         | 0     | 2    | 0    | 1    | 1                                   | 1         | 0     | 0    | 0    | 0    |

Note:  
RSCM/NRH: Ciptomangunkusumo Hospital (National Referral Hospital); HKWCH: Harapan Kita Women and Children Hospital (Health Centre);  
UBH: University Based Hospital; OH: Other Hospital; All: All Hospital; ROP: Retinopathy of Prematurity; BW: Birth weight.

# BMJ Paediatrics Open

## A multicentre survey of retinopathy of prematurity in Indonesia

|                               |                                                                                                                                                                                                                                                                                                                                                                                                                                                                                                                                                                                                                                                                                                                                                                                                                                   |
|-------------------------------|-----------------------------------------------------------------------------------------------------------------------------------------------------------------------------------------------------------------------------------------------------------------------------------------------------------------------------------------------------------------------------------------------------------------------------------------------------------------------------------------------------------------------------------------------------------------------------------------------------------------------------------------------------------------------------------------------------------------------------------------------------------------------------------------------------------------------------------|
| Journal:                      | <i>BMJ Paediatrics Open</i>                                                                                                                                                                                                                                                                                                                                                                                                                                                                                                                                                                                                                                                                                                                                                                                                       |
| Manuscript ID                 | bmjpo-2020-000761.R1                                                                                                                                                                                                                                                                                                                                                                                                                                                                                                                                                                                                                                                                                                                                                                                                              |
| Article Type:                 | Original research                                                                                                                                                                                                                                                                                                                                                                                                                                                                                                                                                                                                                                                                                                                                                                                                                 |
| Date Submitted by the Author: | 17-Aug-2020                                                                                                                                                                                                                                                                                                                                                                                                                                                                                                                                                                                                                                                                                                                                                                                                                       |
| Complete List of Authors:     | Siswanto, J; Rumah Sakit Anak dan Bunda Harapan Kita, Dep. Neonatology; Pelita Harapan University Faculty of Medicine, Pediatric<br>Bos, Arend F.; University Medical Center Groningen Intensive Care Medicine, Neonatology<br>Dijk, Peter; Universitair Medisch Centrum Groningen, Neonatology<br>Rohsiswatmo, Rinawati ; University of Indonesia Faculty of Medicine, Pediatric<br>Irawan, Gatot; Dr Kariadi General Hospital Medical Center, Pediatric<br>Sulistijono, Eko; Dr Saiful Anwar General Hospital, Pediatric<br>Sianturi, Pertin; University of Sumatera Utara Faculty of Medicine, Pediatric<br>Wisnumurti, Dewi; University of Riau Faculty of Medicine, Pediatric<br>Wilar, Rocky; Sam Ratulangi University Faculty of Medicine, Pediatric<br>Sauer, Pieter; Universitair Medisch Centrum Groningen, Neonatology |
| Keywords:                     | Neonatology, Ophthalmology, Epidemiology, Mortality, Health services research                                                                                                                                                                                                                                                                                                                                                                                                                                                                                                                                                                                                                                                                                                                                                     |
|                               |                                                                                                                                                                                                                                                                                                                                                                                                                                                                                                                                                                                                                                                                                                                                                                                                                                   |

SCHOLARONE™  
Manuscripts



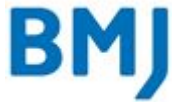

I, the Submitting Author has the right to grant and does grant on behalf of all authors of the Work (as defined in the below author licence), an exclusive licence and/or a non-exclusive licence for contributions from authors who are: i) UK Crown employees; ii) where BMJ has agreed a CC-BY licence shall apply, and/or iii) in accordance with the terms applicable for US Federal Government officers or employees acting as part of their official duties; on a worldwide, perpetual, irrevocable, royalty-free basis to BMJ Publishing Group Ltd ("BMJ") its licensees and where the relevant Journal is co-owned by BMJ to the co-owners of the Journal, to publish the Work in this journal and any other BMJ products and to exploit all rights, as set out in our [licence](#).

The Submitting Author accepts and understands that any supply made under these terms is made by BMJ to the Submitting Author unless you are acting as an employee on behalf of your employer or a postgraduate student of an affiliated institution which is paying any applicable article publishing charge ("APC") for Open Access articles. Where the Submitting Author wishes to make the Work available on an Open Access basis (and intends to pay the relevant APC), the terms of reuse of such Open Access shall be governed by a Creative Commons licence – details of these licences and which [Creative Commons](#) licence will apply to this Work are set out in our licence referred to above.

Other than as permitted in any relevant BMJ Author's Self Archiving Policies, I confirm this Work has not been accepted for publication elsewhere, is not being considered for publication elsewhere and does not duplicate material already published. I confirm all authors consent to publication of this Work and authorise the granting of this licence.

1  
2  
3 **Title:** A multicentre survey of retinopathy of prematurity in Indonesia  
4

5 **First Author/Corresponding Author:** J. Edy Siswanto  
6

7 **Corresponding Author's Institution:**  
8

9 Department of Neonatology, Harapan Kita Women and Children's Hospital  
10

11 **Postal Address:**  
12

13 Rumah Sakit Anak dan Bunda Harapan Kita  
14

15 Jl. Letjen S. Parman Kav. 87  
16

17 Jakarta Barat, DKI Jakarta, ID 11420  
18

19 Indonesia  
20

21 **Email:** edyjo15@yahoo.com, edy.jos@gmail.com  
22

23 **Telephone number:** +62215668284 and +6287786293779  
24

25 **Fax number:** +62215657547  
26

27 **Keywords:** Retinopathy of Prematurity, incidence, mortality  
28

29 **Word count:** 2239  
30

31 **Running title:** Incidence of ROP, mortality, Indonesia  
32  
33  
34  
35  
36  
37  
38  
39  
40  
41  
42  
43  
44  
45  
46  
47  
48  
49  
50  
51  
52  
53  
54  
55  
56  
57  
58  
59  
60

## A multicentre survey of retinopathy of prematurity in Indonesia

J. Edy Siswanto<sup>1a, b</sup>, Arend F. Bos<sup>2</sup>,  
Peter Dijk<sup>2</sup>, Rinawati Rohsiswatmo<sup>3</sup>, Gatot Irawan<sup>4</sup>, Eko Sulistijono<sup>5</sup>, Pertin Sianturi<sup>6</sup>,  
Dewi A. Wisnumurti<sup>7</sup>, Rocky Wilar<sup>8</sup>,  
Pieter JJ Sauer<sup>2</sup>, for the IMSROP study group\*

### Author information

<sup>1a</sup>Neonatology Working Group, Department of Pediatrics, Harapan Kita Women and Children's Hospital, Jakarta, Indonesia

<sup>1b</sup>Faculty of Medicine, Pelita Harapan University, Tangerang

<sup>2</sup>Department of Pediatrics, Beatrix Children's Hospital, University Medical Center Groningen, Groningen, The Netherlands

<sup>3</sup>Department of Pediatrics, Faculty of Medicine, University of Indonesia, Rumah Sakit Cipto Mangunkusumo, Jakarta

<sup>4</sup>Department of Pediatrics, Faculty of Medicine, Diponegoro University, RSUP Dr Kariadi, Semarang, Central Java

<sup>5</sup>Department of Pediatrics, RSUD Dr Syaiful Anwar, Faculty of Medicine, Brawijaya University Malang, East Java

<sup>6</sup>Department of Pediatrics, Faculty of Medicine, University Sumatera Utara (USU), RSUP H. Adam Malik, Medan, North Sumatera

<sup>7</sup>Department of Pediatrics, RSUD Arifin Achmad Pekanbaru, Faculty of Medicine, Riau University

<sup>8</sup>Department of Pediatrics, RSUP Prof. Dr RD Kandou Hospital, Faculty of Medicine, Sam Ratulangi University, Manado, North Sulawesi

### Abstract

**Background** The incidence of retinopathy of prematurity (ROP) is higher in Indonesia than in high-income countries. In order to reduce the incidence of the disease, a protocol on preventing, screening and treating ROP was published in Indonesia in 2010. To assist the practical implementation of the protocol, meetings were held in all regions of Indonesia, calling attention to the high incidence of ROP and the methods to reduce it. In addition, national health insurance was introduced in 2014, making ROP screening and treatment accessible to more infants.

1  
2  
3 **Objective** To evaluate whether the introduction of both the guideline drawing attention to  
4 the high incidence of ROP and the national health insurance may have influenced the  
5 incidence of the disease in Indonesia.  
6  
7  
8  
9

10 **Setting** Data were collected from 34 hospitals with different levels of care: national referral  
11 centres, university-based hospitals and public and private hospitals.  
12  
13  
14

15 **Methods** A retrospective survey was administered with questions on admission numbers,  
16 mortality rates, the incidence of ROP and its stages for 2016-2017 in relation to gestational  
17 age and birth weight.  
18  
19  
20  
21

22 **Results** We identified 12,115 eligible infants with a gestational age of less than 34 weeks.  
23 Mortality was 24% and any-stage ROP 6.7%. The mortality in infants aged less than 28 weeks  
24 was 67%, the incidence of all-stage ROP 18% and severe ROP 4%. In the 28-32 week group,  
25 the mortality was 24%, all-stage ROP 7% and severe ROP 4-5%. Both mortality and the  
26 incidence of ROP were highest in university-based hospitals.  
27  
28  
29  
30  
31  
32  
33

34 **Conclusions** In the 2016-2017 period, the infant mortality rate before 32 weeks of age was  
35 higher in Indonesia than in high-income countries but the incidence of ROP was comparable.  
36 This incidence is likely an underestimation due to the high mortality rate. The ROP incidence  
37 in 2016-2017 is lower than in surveys conducted before 2015. This decline is likely due to a  
38 higher practitioner awareness about ROP and the implementation of national health  
39 insurance in Indonesia.  
40  
41  
42  
43  
44  
45  
46  
47  
48  
49  
50  
51

## 52 **Introduction**

53  
54  
55 Studies on the incidence of retinopathy of prematurity (ROP) during the period 2005-2015 in  
56 Indonesia showed a relatively high incidence of ROP.<sup>1, 2</sup> ROP was also seen in infants with  
57 gestational ages above 32 weeks. In view of these findings, a group of neonatologists and  
58  
59  
60

1  
2  
3 ophthalmologists met in 2009 and 2010 to develop a guideline for the prevention, early  
4 detection and management of ROP for neonatologists and ophthalmologists in Indonesia. The  
5 national guideline, which was published in 2010, provides advice on how to prevent ROP and  
6 how and when to screen newborn infants.<sup>3</sup> It recommends screening all infants born before  
7 34 weeks or with a birthweight of less than 1500 g, as well as infants of higher gestational age  
8 and higher birth weight who received oxygen for a prolonged period. Neonatologists and  
9 paediatric ophthalmologists realized that the guideline's publication had almost no impact on  
10 clinical practice. This was most likely due to a lack of knowledge about ROP among  
11 paediatricians and ophthalmologists and to financial constraints in hospitals.  
12  
13  
14  
15  
16  
17  
18  
19  
20  
21  
22  
23  
24  
25

26 After 2010, the paediatric and ophthalmologist societies in Indonesia therefore organized  
27 several meetings to alert their members to the high incidence of ROP and to ways to prevent  
28 the disease and perform screening procedures. In addition, national health insurance was  
29 introduced in 2014, thereby increasing opportunities to treat premature infants and to  
30 improve ROP screening. Care for preterm infants in Indonesia is provided by two national  
31 referral centres, university-based NICUs (neonatal intensive care centres), as well as  
32 governmental and private hospitals. There are marked variations among these hospitals, such  
33 as patients' socioeconomic and cultural backgrounds and other demographic factors, in terms  
34 of their options for caring for sick preterm infants. We do not know whether the differences  
35 between hospitals resulted in a different incidence of ROP.  
36  
37  
38  
39  
40  
41  
42  
43  
44  
45  
46  
47  
48  
49  
50

51 To evaluate whether an awareness of the high incidence of ROP and the introduction of  
52 national health insurance may have reduced that incidence, we conducted a survey on the  
53 incidence of the disease at Indonesian neonatal intensive care centres and local hospitals in  
54  
55  
56  
57  
58  
59  
60

1  
2  
3 the years 2016-2017. As the incidence may differ between hospitals, we collected data from  
4  
5 all levels of hospitals that provide care for sick newborns.  
6  
7

## 8 9 **Methods**

10  
11 This is a retrospective survey: we collected data for the years 2016-2017 in the period from  
12  
13 March to November 2019. Paediatricians in 47 hospitals were contacted by email and direct  
14  
15 phone calls; 41 were willing to send us the required information. We received responses from  
16  
17 34 hospitals in 17 major provinces of Indonesia – 16 teaching hospitals, two of which are  
18  
19 national referral hospitals for perinatology, and 10 government and eight private hospitals.  
20  
21 The availability of NICU beds varied greatly across between regions because of a lack of  
22  
23 trained neonatologists and differences in stakeholder support in the province or district  
24  
25 where the paediatricians worked. We approached hospitals offering all levels of neonatal  
26  
27 care, located in all the different parts of Indonesia.  
28  
29  
30  
31  
32

33  
34 The survey asked for the following data: number of inborn preterm infants, number of  
35  
36 preterm infants who died in the perinatal period, number of infants screened for ROP,  
37  
38 number of infants with ROP and the stage of ROP. For the sake of uniformity and to analyse  
39  
40 all the data, we asked for inborn babies to be further categorised by gestational age and birth  
41  
42 weight. For ROP, we used the terms mild ROP (stages 1-2) and severe ROP (stage 3 or higher).  
43  
44 We included only inborn infants because important data such as gestational age and  
45  
46 complications in pregnancy are often not available for outborn infants. We analysed the  
47  
48 university-based hospitals and the district (government)/private hospitals in two separate  
49  
50 groups. The data for the two national referral perinatal centres are shown separately. The  
51  
52 results are described in frequencies and percentages. No advance statistical test was used for  
53  
54 the data analysis.  
55  
56  
57  
58  
59  
60

## Patient involvement

Neither patients nor the public were involved in the design, execution, reporting or dissemination plans for our research.

## Results

We received data from the two national referral hospitals for perinatology (Harapan Kita Women and Children's Health Centre and RSCM-Ciptomangunkusumo Hospital), 14 university-based hospital NICUs and 18 other hospitals, which included 10 government hospitals and eight private hospitals (Table 1).

In total, we received data on 12,115 infants with a gestational age <34 weeks, 5,252 of whom had a birth weight of less than 1500 g. The overall mortality of infants <34 weeks was 24.1%.

Almost 37% of surviving infants were screened for ROP; the incidence of all-stage ROP was 6.7%. The highest incidence of both mortality and ROP was found the university-based hospitals (Table 1).

Table 2 shows the data for each hospital or group of hospitals according to gestational age. The overall mortality in the group <28 weeks was 67%, with no differences between hospitals. Sixty-three percent of surviving infants were screened for ROP. The rate of screening ranged from 93% in one referral hospital to 42% in the 'other hospitals' group. The overall rate of any-stage ROP was 18% and severe ROP 4%. The incidence of both any-stage ROP and severe ROP was higher in the university-based NICUs and other hospitals than in the two national centres (18 and 21% vs 4 and 8%) (Figure 1). Severe ROP was not seen in the national centres, but was found in 4% and 5% of infants in the university and other hospitals respectively. The same trend was found in infants born after 28-32 weeks. Overall mortality in this group was

1  
2  
3 24%, with the highest mortality in the university hospitals (31%), compared with 11% in one  
4  
5 of the national centres. The rate of screening in the 28-32 week group was lower than in the  
6  
7 <28 week group (41 vs 63%) and ranged from 86% in one national centre to 19% in the 'other  
8  
9 hospitals' group. Any stage ROP was found in 7% of surviving infants, with the highest  
10  
11 incidence (11%) in university hospitals and 1-2% in other hospitals. The incidence of severe  
12  
13 ROP was 0-1% in all hospitals. The mortality in the 32-34 week group was 14% on average,  
14  
15 with no important differences between hospitals. The rate of screening in these infants was  
16  
17 32% and the prevalence of any stage ROP was 4%, with the highest incidence in university-  
18  
19 based hospitals.  
20  
21  
22  
23  
24  
25

26 The supplementary table shows the data for each hospital or group of hospitals according to  
27  
28 birth weight. The overall mortality in the <1000 g group was 61%, with no differences between  
29  
30 groups of hospitals. Forty-six percent of surviving infants were screened for ROP; the rate of  
31  
32 screening ranged from 88% in one referral hospital to 33% in the 'other hospitals' group. The  
33  
34 overall rate of any stage ROP was 18% and severe ROP 3%. The incidence of both any stage  
35  
36 ROP and severe ROP was higher in the university-based NICUs and other hospitals than in the  
37  
38 two national centres (20% vs 8 and 10%). Severe ROP was not encountered in the national  
39  
40 centres but was seen in 3% and 6% respectively of infants in the university and other hospitals.  
41  
42  
43 The same trend was found in infants born with a birth weight of 1000-1500 g. Overall  
44  
45 mortality in this group was 30%, with the highest mortality in the university and other  
46  
47 hospitals (30%), compared with 15% in one of the national centres. The rate of screening in  
48  
49 the 1000-1500 g group was higher than in the <1000 g group (55% vs 46%), and ranged from  
50  
51 90% in one national centre to 36% in the 'other hospitals' group. Any-stage ROP was found in  
52  
53 8% of surviving infants, with the highest incidence (13%) in the university hospitals and 3% in  
54  
55 other hospitals. The incidence of severe ROP was 1% in all hospitals. The mortality in the  
56  
57  
58  
59  
60



1  
2  
3 >1500-2000 g group was 12% on average, with no significant differences between hospitals.

4  
5 The rate of screening in these infants was 33% and the prevalence of any stage ROP was 3%,  
6  
7  
8 with the highest incidence in university-based hospitals (5%).  
9

10  
11 In order to assess whether the screening rate may have affected the incidence of ROP found  
12  
13 in our survey, we calculated the incidence of ROP in 13 of the 34 hospitals where at least 80%  
14  
15 of infants were screened once or more (table 3). There was no difference in the rate of ROP  
16  
17 between these hospitals and the total group. In the <28 weeks group, the ROP rate at all  
18  
19 stages was 21% and 5% for severe ROP. In the 28-32 weeks group, the incidence of all ROP  
20  
21 stages was 6% and severe ROP 1%.  
22  
23  
24

## 25 26 27 **Discussion**

28  
29 Globally, ROP is one of the hidden causes of morbidity following death-related problems such  
30  
31 as respiratory distress (asphyxia), infections and other complications that arise in small, sick  
32  
33 preterm infants. Countries with a high rate of premature births will consequently see a higher  
34  
35 number of infants affected by ROP. This situation occurs in almost all parts of the world, both  
36  
37 in high-income (HIC) and lower middle income countries (LMIC).<sup>4</sup>  
38  
39

40  
41  
42 What has been characterised as the third ROP epidemic has particularly affected countries in  
43  
44 Southeast Asia. It is clear that many cases of visual impairment due to ROP are preventable  
45  
46 through improved neonatal care, timely retinal examination and appropriate treatment.<sup>5</sup> In  
47  
48 this survey, we present data on the incidence and severity of ROP following the  
49  
50 implementation of a national guideline for the prevention, screening and treatment of ROP  
51  
52 and the introduction of national health insurance in Indonesia, one of the major regions in  
53  
54 Southeast Asia.  
55  
56  
57  
58  
59  
60

1  
2  
3 This survey conducted in 2016-2017 found the incidence of ROP in Indonesia in that period to  
4  
5 be much lower than the incidence we found in 2005-2015.<sup>1,2</sup> In that previous period, we found  
6  
7 in one NICU a 40% incidence of all-stage ROP in infants below 28 weeks and a 28% incidence  
8  
9 in the 28-32 week group.<sup>1</sup> Other studies from the period 2005-2015 in Indonesia found a ROP  
10  
11 incidence of 18-30% in infants born before 32 weeks and/or with a birth weight of less than  
12  
13 1500 g.<sup>2</sup> Different factors may have contributed to this marked decline in ROP. Firstly, a  
14  
15 national guideline for ROP prevention and screening was published in 2010. When we realized  
16  
17 that simply publishing this guideline did not change practices in Indonesia, several focus  
18  
19 meetings were held across the country to alert practitioners to the high incidence of ROP, the  
20  
21 methods to prevent ROP and the importance of screening.<sup>3</sup> In addition, national health  
22  
23 insurance was introduced in 2014, thereby improving opportunities for treating and screening  
24  
25 preterm infants. We cannot identify which of these factors may have had the greatest impact  
26  
27 on the decline in incidence of ROP.  
28  
29  
30  
31  
32  
33  
34

35 It is difficult to compare the incidence of ROP in Indonesia with the incidence reported in HIC.  
36  
37 A recent study from Greece showed an incidence of any stage ROP in infants <32 weeks of  
38  
39 19.7% and severe ROP 7.4%.<sup>6</sup> The EXPRESS study from Sweden found an incidence of any  
40  
41 stage ROP in infants <31 weeks of 31.9% and severe ROP 5.7%.<sup>7</sup> There is a marked difference,  
42  
43 however, between Indonesia and HIC in the type of infants cared for and their survival. In  
44  
45 Indonesia, almost no infants born after a gestational age of 26 weeks or less will survive.  
46  
47 Mortality among infants of 26-28 weeks is much higher than in HIC. In our survey, we found  
48  
49 that 67% of infants born <28 weeks died. Recent data from Sweden, England, France, the  
50  
51 Netherlands, Canada and the USA show a survival rate for infants born between 26-28 weeks  
52  
53 of 80-90%.<sup>8-18</sup> In Indonesia, only the healthier very preterm infants will survive. The incidence  
54  
55 of ROP may be lower in these infants than in the very sick newborns who died. The same may  
56  
57  
58  
59  
60

1  
2  
3 be true of infants born after 28-32 weeks. In Indonesia, we found that 24% of these infants  
4  
5 died. In HIC, that figure is less than 5%. The present data on the incidence of ROP in Indonesia  
6  
7  
8 could be an underestimation caused by the higher death rate in Indonesia.  
9

10  
11 Studies conducted in other LMIC up to 2015 also showed a higher incidence of ROP than in  
12  
13 HIC. In addition, ROP was seen in infants with a higher gestational age and birth weight. A  
14  
15 study from the Philippines showed a ROP incidence of 14% in all infants born before 36  
16  
17 weeks.<sup>19</sup> A small study from Brunei showed a prevalence of 35% in infants with a birth weight  
18  
19 of  $1300 \pm 500$  g and a gestational age of  $29.5 \pm 2.6$  weeks.<sup>20</sup> In Thailand, a ROP incidence of  
20  
21 14% was found in infants with a mean birthweight of 1514 g and a gestational age of 31.8  
22  
23 weeks.<sup>21</sup> In line with our findings for the period 2005-2015, these data indicate that ROP is  
24  
25 prevalent in LMIC, including in infants with a higher birthweight and gestational age. A recent  
26  
27 paper describes the current state of ROP in eight LMIC.<sup>22</sup> The incidence of ROP was not  
28  
29 available for all countries. This incidence, mostly based on smaller studies in one institution,  
30  
31 ranged from 14% to 50%. In almost all countries, infants up to 34 weeks and with a  
32  
33 birthweight of 2000 g were screened. A study from Thailand, where only infants born <30  
34  
35 weeks and with a birthweight of <1500 g were screened, found a ROP incidence of 40%. In all  
36  
37 countries, the screening rate was low, at <35%. The reasons mentioned for the high incidence  
38  
39 of ROP was similar for all countries: a lack of awareness among paediatricians, a shortage of  
40  
41 trained ophthalmologists and a lack of funds for screening. Almost all countries lacked oxygen  
42  
43 delivery systems and oxygen saturation monitors. All countries fear an epidemic of blind  
44  
45 infants as a result of ROP. In our view, the results of our survey indicate that it is possible to  
46  
47 reduce the incidence of ROP, also in LMIC. The first step to stop this epidemic is to be aware  
48  
49 of the risks of ROP. This concerns all those involved in the care of preterm infants,  
50  
51 paediatricians, ophthalmologists, nurses and administrators.  
52  
53  
54  
55  
56  
57  
58  
59  
60

1  
2  
3 Our study found that the screening rate for ROP is rather low in Indonesia, both in infants  
4 with a low gestational age and in infants with a higher gestational age who received  
5 supplemental oxygen for a prolonged period. This is most likely due to at least three factors:  
6  
7 a lack of trained ophthalmologists, a lack of awareness among paediatricians of the  
8 importance of screening and a lack of funding for ophthalmologists. Paediatric  
9 ophthalmologists are mainly found in large academic hospitals and the national centres for  
10 perinatology. In almost all cases, there is only one paediatric ophthalmologist who is not  
11 always available. In order to increase the screening rate, paediatricians must be made aware  
12 of its importance and ophthalmologists must be trained to do it. Funds to carry out the  
13 screening need to be made available.

14  
15 We found no difference in the incidence of ROP in the institutions with a screening rate of at  
16 least 80%, compared to the whole group of infants. This indicates that a high number of  
17 infants are not screened while they develop ROP. The follow-up of preterm infants admitted  
18 to a NICU is low in Indonesia because of socioeconomic factors. It is not therefore known how  
19 often ROP was present in surviving, unscreened infants.

20  
21 A lack of ophthalmologists trained in ROP screening is not a problem that is unique to  
22 Indonesia. There is a shortage of trained ophthalmologists in many LMIC and, where they do  
23 exist, screening is often not properly reimbursed and only the most committed  
24 ophthalmologists are willing to screen.<sup>23</sup>

25  
26 In addition, paediatricians participating in this survey reported a reluctance among  
27 ophthalmologists to screen because of medico-legal problems, an imbalance between the  
28 level of difficulty and time spent examining very small premature babies and the results  
29 obtained, and the asynchronous examination fees in different health insurance systems. This  
30  
31

1  
2  
3 all contrasts with the practice in HIC, where failure to screen an eligible infant for ROP could  
4  
5 be considered malpractice.  
6

7  
8  
9 The incidence of ROP in Harapan Kita Women and Children's Hospital was significantly lower  
10  
11 in the period 2016-2017 than in the period 2005-2015. At the same time, the screening rate  
12  
13 improved to 93%. This indicates that ROP declined significantly at that hospital. In 2016, a  
14  
15 strict policy was introduced to set the oxygen saturation monitor at 91% to 95% for preterm  
16  
17 infants. The use of oxygen in the delivery room was also strictly regulated, with resuscitation  
18  
19 of preterm infants starting at 30% oxygen. CPAP was given directly after birth and continued  
20  
21 in the NICU. These measures are likely to have played an important role in reducing the  
22  
23 incidence of ROP at that NICU.  
24  
25  
26  
27

28  
29 The highest rate of both mortality and ROP was found in the university-based hospitals. These  
30  
31 are referral hospitals that admit mothers with antenatal complications. They may therefore  
32  
33 treat the sickest infants, sicker than those cared for in governmental and private hospitals.  
34  
35 This could explain the higher rate of mortality and ROP. At the same time, however, the two  
36  
37 national centres are also referral hospitals and they showed a lower mortality rate and a lower  
38  
39 incidence of ROP (figures 1,2). This suggests that there could be other factors behind the  
40  
41 higher incidence of ROP in the university-based hospitals. More liberal use of oxygen might  
42  
43 be a cause. More studies are needed to determine the cause of the less favourable outcome  
44  
45 in the university-based hospitals.  
46  
47  
48  
49

50  
51 A limitation of this study is that the survey on the incidence of ROP as carried out in this study  
52  
53 had not been done before. As a reference in this paper, we used data from one referral  
54  
55 hospital as well as data from the literature. The rates of ROP found in one hospital in  
56  
57 Indonesia<sup>1</sup> and the studies done in other centres<sup>2</sup> all showed a high incidence of ROP in the  
58  
59  
60

1  
2  
3 period before 2015. Therefore, we are convinced that the incidence of ROP was indeed much  
4  
5 higher than suggested by the results of this survey. A second limitation of our survey is that  
6  
7 we only included inborn infants. We do not have precise data on the ratio of inborn and  
8  
9 outborn infants for all hospitals. In the Harapan Kita Hospital, one of the national referral  
10  
11 hospitals, on average 71% of the admitted infants are inborn. We estimate that this  
12  
13 percentage will be almost the same for the university-based NICUs. Unfortunately, there is  
14  
15 no adequate neonatal transport service in Indonesia. Transportation is carried out by poorly  
16  
17 trained personnel and only 100% oxygen can be given during transport. The referring and  
18  
19 accepting neonatologists do not meet, making the transfer of information difficult and often  
20  
21 incomplete.  
22  
23  
24  
25  
26  
27

## 28 **Conclusion**

29  
30  
31 The incidence of ROP in preterm infants in Indonesia was lower in 2016-2017 than in the  
32  
33 period before 2015. This may be due to a higher awareness of ROP among practitioners and  
34  
35 the introduction of a national healthcare plan. Our data, however, are likely to be an  
36  
37 underestimation of the real incidence of ROP because of the higher mortality rate among  
38  
39 small premature infants in Indonesia than in HIC and a low rate of screening and follow-up of  
40  
41 surviving preterm infants.  
42  
43  
44  
45  
46  
47  
48  
49

50 **Acknowledgements** The authors would like to thank all infants and families whose data  
51  
52 contributed to the IMSROP Study Group. We wish to thank our ophthalmologists Dr  
53  
54 Habsyiyah, Dr Nani H. Widodo and Dr Florence Manurung. Together with all the  
55  
56 ophthalmologists at each hospital included in this study, they were involved in examining  
57  
58 patients and providing scientific input in the field of ophthalmology. We would also like to  
59  
60

thank Prof. Rita S. Sitorus, who encouraged us to work together to reduce the incidence of ROP in Indonesia in terms of neonatology, ophthalmology and public health.

### Collaborators

\*Members of the IMSROP (Indonesian Multicenter Retinopathy of Prematurity) Study Group: Rinawati Rohsiswatmo (*Rumah Sakit Cipto Mangunkusumo, Jakarta Pusat*), Tetty Yuniati (*RSUP Hasan Sadikin, Bandung, Jawa Barat*), Gatot Irawan Sarosa (*RSUP Dr Kariadi, Semarang, Jawa Tengah*), Dwi Hidayah (*RSUD Dr Moewardi, Solo, Jawa Tengah*), Dina Angelika dan Risa Etika (*RSUD Dr Soetomo Surabaya, Jawa Timur*), Eko Sulistijono (*RSUD Dr Syaiful Anwar Malang, Jawa Timur*), Made Kardana (*RSUP Sanglah, Denpasar, Bali*), Pertin Sianturi (*RSUP H. Adam Malik, Medan, Sumatera Utara*), Eni Yantri (*RSUP Dr M. Djamil Padang, Sumatera Barat*), Dewi Anggraini Wisnumurti (*RSUD Arifin Achmad Pekanbaru, Riau*), Afifa Ramadanti (*RSUP M. Hoesin Palembang, Sumatera Selatan*), Pudji Andayani (*RSUD Ulin Banjarmasin Kalimantan Selatan*), Rocky Wilar (*RSUP Prof. Dr RD Kandou Hospital, Manado*), Ema Alasiry (*RSUP Dr Wahidin Sudirohusodo, Makasar, Sulawesi Selatan*), Harris Alfian (*RS Atma Jaya, Jakarta Utara*), Johanes Edy Siswanto (*RSAB Harapan Kita dan RS Royal Taruma, Jakarta Barat*), Naomi Esthernita (*Siloam Hospital Kebon Jeruk, Jakarta Barat*), Fahrul Wakil Arbi (*RS Budi Kemuliaan, Jakarta Pusat*), Nita Dewanti (*RS Premier Bintaro, Jakarta Selatan*), Agnes Yuni Purwita Sari (*RSUP Persahabatan, Jakarta Timur*), Ellen Sianipar (*RSUD Pasar Rebo Jakarta Timur*), Robert Soetandio (*RS Awal Bros Hospital, Tangerang, Jawa Barat*), Andika Tiurmaida (*RSUD Cibinong, Jawa Barat*), Thomas Harry Adoe (*RSUD Kota Bekasi*), Muda Isa Ariantana (*Santosa Hospital Bandung Cermat Bandung, Jawa Barat*), Samad (*RSUP Dr Soeradji Tirtonegoro Klaten*), Anince (*RS Bakti Timah Karimun, Kepulauan Riau*), Tri Putri Yuliani (*RSUD Siti Aisyah Kota Lubuk Linggau, Sumsel*), Dina Frida (*RSUD Dr Sudarso, Kalimantan Barat dan RS Anugrah Bunda Khatulistiwa, Kalimantan Barat*), Nurhandini Eka Dewi (*RSUD Mataram, Nusa Tenggara Barat*), Woro Indri P. Purba (*RSUD Prof. Dr WZ Johannes Kupang, Nusa Tenggara Timur*), Sadiyah (*RSUD I Lagaligo, Luwu Timur, Sulawesi Selatan*).

**Contributors** JES is the person directly involved in all aspects of this research and manuscript.

JES, AB, PD and PJJS contributed to the study design and analysis. PJJS assisted in the literature review and wrote the report and the discussion section. AFB and PJJS are the guarantors for the study. JES, AB and PJJS had full access to the IMSROP data. All authors had full access to the summary data presented in this paper (including statistical reports and tables) and take responsibility for the integrity of the data and the accuracy of the data analysis.

1  
2  
3 **Funding** The authors have not declared a specific grant for this research from any funding  
4  
5 agency in the public, commercial or not-for-profit sectors.  
6  
7

8  
9 **Conflict of interests** None declared.  
10

11  
12 **Patient consent** Detail has been removed from these case descriptions to ensure anonymity.  
13  
14 The editors and reviewers have seen the detailed information available and are satisfied that  
15  
16 the information backs up the case the authors are making.  
17  
18

19  
20 **Ethics approval** The study was approved by the Institutional Review Board of the University  
21  
22 of Indonesia School of Public Health (No. 32/H2.F10/PPM.00/13).  
23  
24

25  
26 **Provenance and peer review** Not commissioned; externally peer-reviewed.  
27  
28  
29  
30

31  
32 What is already known on this topic?  
33

- 34  
35 ▶ Several studies in the previous decade in Indonesia showed a high incidence of ROP, which  
36  
37 is a serious problem, as in other LMIC countries.  
38  
39  
40  
41 ▶ The high rate of ROP in Indonesia is likely due to the expansion of neonatal intensive  
42  
43 care, whereas there is a lack of awareness of the risks of developing ROP.  
44  
45

46  
47 What does this study add?  
48

- 49  
50 ▶ The incidence of ROP in Indonesia was lower in 2016-2017 than in surveys  
51  
52 conducted before 2015.  
53  
54  
55 ▶ There was a difference in mortality and rate of ROP between the types of hospital. Both  
56  
57 mortality and the incidence of ROP were highest in university-based hospitals.  
58  
59  
60 ▶ The lower rate of ROP could be the result of a new national guideline on ROP, an



1  
2  
3 increased awareness following meetings and the introduction of national health care.  
4  
5  
6  
7

## 8 **References**

- 9
- 10 1. Siswanto JE, Nani H Widodo NH, Sauer PJJ. *Arch Dis Child* 2018;103:619–21.
- 11 2. Siswanto JE, Sauer PJ. Retinopathy of prematurity in Indonesia: Incidence and  
12 riskfactors. *J Neonatal Perinatal Med* 2017;10:85–90.
- 13 3. Sitorus RS et al. POKJA Nasional ROP dan Bayi Prematur, Pedoman Nasional: Skrining  
14 dan Terapi ROP pada bayi prematur di Indonesia. eds 1. 2010
- 15 4. Gilbert C, Blencowe H. Retinopathy of prematurity: it is time to take action. *Comm Eye*  
16 *Health* Vol. 30 No. 99 2017 pp 45-48
- 17 5. Darlow BA, Gilbert CE, Quirogaet AM. Setting up and improving retinopathy of  
18 prematurity pros: interaction of neonatology, nursing and ophthalmology. *Clin*  
19 *Perinatol* 2013;40:215–27
- 20 6. Mataftsi A, Moutzouri S, Karagianni P, et al. Retinopathy of prematurity occurrence and  
21 evaluation of screening policy in a large tertiary Greek cohort. *Int Ophthalmol*  
22 2020;40:385-91
- 23 7. Austeng D, Källén K, Hellström A, et al. Regional differences in screening for retinopathy  
24 of prematurity in infants born before 27 weeks of gestation in Sweden – the EXPRESS  
25 study. *Acta Ophthalmol* 2014; 92:311-5.
- 26 8. Draper ES, Zeitlin J, Field DJ, et al. Mortality patterns among very preterm babies: A  
27 comparative analysis of two European regions in France and England. *Arch Dis Child*  
28 *Fetal Neonatal Ed* 2007; 92: 356–360.
- 29 9. Milligan DW. Outcomes of children born very preterm in Europe. *Arch Dis Child Fetal*  
30 *Neonatal Ed* 2010;95:F234-40.
- 31 10. Draper ES, Zeitlin J, Fenton AC, et al, on behalf of the MOSAIC research group.  
32 Investigating the variations in survival rates for very preterm infants in 10 European  
33 regions: the MOSAIC birth cohort. *Arch Dis Child Fetal Neonatal Ed* 2009;3:F158-63.
- 34 11. Mohangoo AD, Buitendijk SE, Szamotulska K, et al. Gestational Age Patterns of Fetal  
35 and Neonatal Mortality in Europe: Results from the Euro-Peristat Project. *PLoS ONE*  
36 2011;6:e24727.
- 37 12. Serenius F, Sjörs G, Blennow M, et al, and For the EXPRESS study group\*. EXPRESS  
38 study shows significant regional differences in 1-year outcome of extremely preterm  
39 infants in Sweden. *Acta Paediatr* 2014;103:27–37.
- 40 13. Santhakumaran S, Statnikov Y, Gray D, et al, on behalf of the Medicines for Neonates  
41 Investigator Group. Survival of very preterm infants admitted to neonatal care in  
42 England 2008–2014: time trends and regional variation. *Arch Dis Child Fetal Neonatal*  
43 *Ed* 2018;103:F208–F215.
- 44  
45  
46  
47  
48  
49  
50  
51  
52  
53  
54  
55  
56  
57  
58  
59  
60

14. Norman M, Hallberg B, Abrahamsson T, et al. Association Between Year of Birth and 1-Year Survival Among Extremely Preterm Infants in Sweden During 2004-2007 and 2014-2016. *JAMA* 2019; 321:1188-1199.
15. Lee SK, McMillan DD, Ohlsson A, et al. Variations in practice and outcomes in the Canadian NICU network: 1996-1997. *Pediatrics* 2000;106:1070-9.
16. Stoll BJ, Hansen NI, Bell EF, et al. Neonatal Outcomes of Extremely Preterm Infants From the NICHD Neonatal Research Network. *Pediatrics* 2010; 126: 443-456.
17. Stoll BJ, Hansen NI, Bell EF, et al. Trends in Care Practices, Morbidity, and Mortality of Extremely Preterm Neonates, 1993-2012. *JAMA* 2015;314:1039-51.
18. Su BH, Hsieh WS, Hsu CH, et al. Premature Baby Foundation of Taiwan (PBFT). Neonatal Outcomes of Extremely Preterm Infants From Taiwan: Comparison With Canada, Japan, and the USA. *Pediatr Neonatol* 2015;56:46-52.
19. Corpus K, Jimenez IV JM, Anzures R, Bascuna RI, Ventura R, Reandelar Jr M. Retinopathy of Prematurity Working Group. Proposed New Retinopathy of Prematurity Screening Criteria: Evidence for Including Older and Heavier Filipino Premature Babies. *Philipp J Ophthalmol* 2013;38:72-79.
20. Ali NAM, George J, Joshi N, et al. Prevalence of retinopathy of prematurity in Brunei Darussalam. *Int J Ophthalmol* 2013;3: 381-384.
21. Trinavarat A, Atchaneeyasakul L, Udompunteruk S. Applicability of American and British criteria for screening of retinopathy of prematurity in Thailand. *Jpn J Ophthalmol* 2004;48:50-3.
22. Bowe T, Nyamai L, Ademola-Popoola D, et al. The current state of retinopathy of prematurity in India, Kenya, Mexico, Nigeria, Philippines, Romania, Thailand, and Venezuela. *Digit J Ophthalmol* 2019;4: 49-58.
23. Gilbert CE. Screening for retinopathy of prematurity: does one size fit all? *Arch Dis Child Fetal Neonatal* Ed July 2016 Vol 101 No 4

#### Figure legend

Figure 1. The incidence of ROP based on gestational age in each group of hospitals in Indonesia 2016-2017.

Figure 2. Mortality based on the gestational age in each group of hospitals in Indonesia 2016-2017

**Table 1. Hospital-based ROP data surveillance in Indonesia 2016-2017 (GA ≤ 34 weeks)**

| Type of hospital      | Total hospitals | Total infants | Survived | Died |      | Screened |      | ROP |     |
|-----------------------|-----------------|---------------|----------|------|------|----------|------|-----|-----|
|                       |                 |               |          | n    | %    | n        | %    | n   | %   |
| RSCM/NRH              | 1               | 1038          | 890      | 148  | 14.3 | 392      | 44.0 | 7   | 1.8 |
| HKWCHC                | 1               | 478           | 392      | 86   | 18.0 | 281      | 71.7 | 7   | 2.5 |
| UBH                   | 14              | 6549          | 4738     | 1811 | 27.7 | 2041     | 43.1 | 197 | 9.7 |
| OH                    | 18              | 4050          | 3261     | 789  | 19.5 | 711      | 21.8 | 17  | 2.4 |
| - Government hospital | 10              | 3020          | 2425     | 595  | 19.7 | 605      | 24.9 | 15  | 2.5 |
| - Private hospital    | 8               | 1030          | 836      | 194  | 18.8 | 106      | 12.7 | 2   | 1.9 |
| All hospitals         | 34              | 12115         | 9281     | 2834 | 23.4 | 3425     | 36.9 | 228 | 6.7 |

Note: RSCM/NRH: Ciptomangunkusumo Hospital (national referral hospital); HKWCH: Harapan Kita Women and Children’s Hospital (National Centre for Women and Children’s Health); UBH: university-based hospital; OH: other hospital; All: all hospitals; ROP; retinopathy of prematurity.

**Table 2a. ROP incidence in Harapan Kita Women and Children's Hospital, Indonesia based on the gestational age in 2005-2017**

| Variable                        |   | Infants GA <28 wks |           | Infants GA 28 - 32 wks |           | Infants GA >32 - 34 wks |           |
|---------------------------------|---|--------------------|-----------|------------------------|-----------|-------------------------|-----------|
|                                 |   | 2005-2015          | 2016-2017 | 2005-2015              | 2016-2017 | 2005-2015               | 2016-2017 |
| <b>Total (inborn infants)</b>   | n | 185                | 54        | 569                    | 221       | NA                      | 203       |
| <b>Died</b>                     | n | 91                 | 27        | 126                    | 24        | -                       | 24        |
|                                 | % | 49                 | 50        | 22                     | 11        | -                       | 12        |
| <b>Survived</b>                 | n | 94                 | 27        | 443                    | 197       | -                       | 179       |
| <b>Screened</b>                 | n | 47                 | 25        | 261                    | 169       | 156                     | 87        |
| <b>Screened/Survived</b>        | % | 50                 | 93        | 59                     | 86        | -                       | 49        |
| <b>No ROP</b>                   | n | 28                 | 23        | 187                    | 167       | 126                     | 84        |
| <b>ROP 1-2</b>                  | n | 9                  | 2         | 66                     | 1         | 29                      | 3         |
| <b>ROP 3-5</b>                  | n | 10                 | 0         | 8                      | 1         | 1                       | 0         |
| <b>Prevalence of Any ROP</b>    | % | 40                 | 8         | 28                     | 1         | 19                      | 3         |
| <b>Prevalence of Severe ROP</b> | % | 21                 | 0         | 3                      | 1         | 1                       | 0         |

Note: ROP: Retinopathy of Prematurity; GA: gestational age; wks: weeks.

Table 2b. ROP incidence in Indonesia based on the gestational age in 2016-2017

| Variable                 |   | Infants GA <28 weeks |       |     |     |      | Infants GA 28 - 32 weeks |       |      |      |      | Infants GA >32-34 weeks |       |      |      |      |
|--------------------------|---|----------------------|-------|-----|-----|------|--------------------------|-------|------|------|------|-------------------------|-------|------|------|------|
|                          |   | 2016-2017            |       |     |     |      | 2016-2017                |       |      |      |      | 2016-2017               |       |      |      |      |
|                          |   | RSCM                 | HKWCH | UBH | OH  | All  | RSCM                     | HKWCH | UBH  | OH   | All  | RSCM                    | HKWCH | UBH  | OH   | All  |
| Total (inborn infants)   | n | 115                  | 54    | 903 | 354 | 1426 | 501                      | 221   | 2288 | 2044 | 5054 | 422                     | 203   | 3358 | 1652 | 5635 |
| Died                     | n | 87                   | 27    | 577 | 259 | 961  | 122                      | 24    | 700  | 349  | 1195 | 26                      | 24    | 534  | 181  | 765  |
|                          | % | 76                   | 50    | 64  | 73  | 67   | 24                       | 11    | 31   | 17   | 24   | 6                       | 12    | 16   | 11   | 14   |
| Survived                 | n | 28                   | 27    | 326 | 95  | 465  | 379                      | 197   | 1588 | 1695 | 3859 | 396                     | 179   | 2824 | 1471 | 4870 |
| Screened                 | n | 23                   | 25    | 204 | 40  | 292  | 187                      | 169   | 923  | 315  | 1594 | 182                     | 87    | 914  | 356  | 1539 |
| Screened/Survived        | % | 82                   | 93    | 63  | 42  | 63   | 49                       | 86    | 58   | 19   | 41   | 46                      | 49    | 32   | 24   | 32   |
| No ROP                   | n | 22                   | 23    | 161 | 33  | 239  | 185                      | 167   | 751  | 309  | 1478 | 178                     | 84    | 441  | 352  | 1480 |
| ROP 1-2                  | n | 1                    | 2     | 34  | 5   | 42   | 2                        | 1     | 94   | 6    | 103  | 2                       | 3     | 45   | 2    | 52   |
| ROP 3-5                  | n | 0                    | 0     | 9   | 2   | 11   | 0                        | 1     | 12   | 0    | 13   | 2                       | 0     | 3    | 2    | 7    |
| Prevalence of Any ROP    | % | 4                    | 8     | 21  | 18  | 18   | 1                        | 1     | 11   | 2    | 7    | 2                       | 3     | 5    | 1    | 3.8  |
| Prevalence of Severe ROP | % | 0                    | 0     | 4   | 5   | 4    | 0                        | 1     | 1    | 0    | 1    | 1                       | 0     | 0    | 1    | 0.4  |

Note: RSCM/NRH: Ciptomangunkusumo Hospital (national referral hospital); HKWCH: Harapan Kita Women and Children Hospital (National Centre for Women and Children's Health); UBH: university-based hospital; OH: other hospital; All: all hospitals; ROP; Retinopathy of Prematurity; GA: gestational age.

**Table 3. Incidence of ROP in hospitals with 80% screening coverage in Indonesia, 2016-2017**

| Variable                       |   | Birth weight |             |              |               |         | Gestational age |           |           |            |         |
|--------------------------------|---|--------------|-------------|--------------|---------------|---------|-----------------|-----------|-----------|------------|---------|
|                                |   | <1000 g      | 1000-1500 g | >1500-2000 g | >2000-<2500 g | ≥2500 g | <28 wks         | 28-32 wks | 32-34 wks | 34-<37 wks | ≥37 wks |
| <b>Total (inborn)</b>          | n | 585          | 1541        | 2679         | 4522          | 20572   | 560             | 2144      | 2319      | 3913       | 20963   |
| <b>Died</b>                    | n | 394          | 449         | 303          | 163           | 266     | 391             | 508       | 244       | 165        | 267     |
|                                | % | 67           | 29          | 11           | 4             | 1       | 70              | 24        | 11        | 4          | 1       |
| <b>Survived</b>                | n | 191          | 1092        | 2376         | 4359          | 20306   | 169             | 1636      | 2075      | 3748       | 20696   |
| <b>Screened</b>                | n | 172          | 1040        | 1033         | 1186          | 14      | 168             | 1147      | 926       | 1199       | 5       |
| <b>Screened/Survived</b>       | % | 90           | 95          | 43           | 27            | 0       | 99              | 70        | 45        | 32         | 0       |
| <b>No ROP</b>                  | n | 137          | 966         | 978          | 1159          | 14      | 132             | 1074      | 874       | 1169       | 5       |
| <b>ROP 1-2</b>                 | n | 28           | 57          | 53           | 27            | 0       | 27              | 62        | 46        | 30         | 0       |
| <b>ROP 3-5</b>                 | n | 7            | 17          | 2            | 0             | 0       | 9               | 11        | 6         | 0          | 0       |
| <b>Incidence of Any ROP</b>    | % | 20           | 7           | 5            | 2             | 0       | 21              | 6         | 6         | 3          | 0       |
| <b>Incidence of Severe ROP</b> | % | 4            | 2           | 0            | 0             | 0       | 5               | 1         | 1         | 0          | 0       |

Note: these data come from 13 of 34 hospitals; ROP: retinopathy of prematurity

1  
2  
3  
4  
5  
6  
7  
8  
9  
10  
11  
12  
13  
14  
15  
16  
17  
18  
19  
20  
21  
22  
23  
24  
25  
26  
27  
28  
29  
30  
31  
32  
33  
34  
35  
36  
37  
38  
39  
40  
41  
42  
43  
44  
45  
46  
47  
48  
49  
50  
51  
52  
53  
54  
55  
56  
57  
58  
59  
60

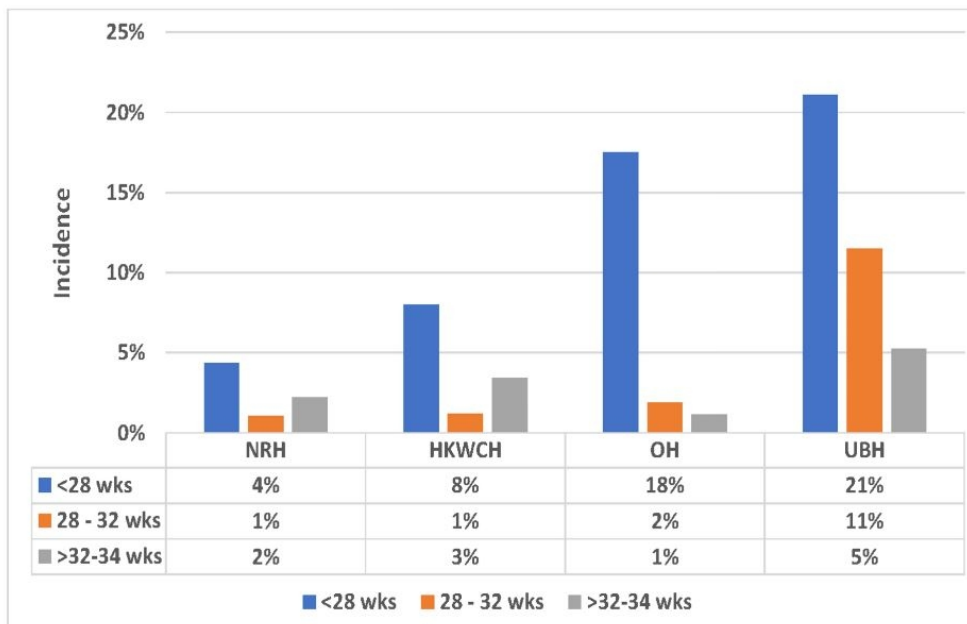

Note: NRH/RSCM: National Referral Hospital (Ciptomangunkusumo Hospital); HKWCH: Harapan Kita Women and Children Hospital (National Centre for Women and Children's Health); UBH: University Based Hospital; OH: Other Hospital; All: All Hospital; wks: weeks.

248x180mm (96 x 96 DPI)

1  
2  
3  
4  
5  
6  
7  
8  
9  
10  
11  
12  
13  
14  
15  
16  
17  
18  
19  
20  
21  
22  
23  
24  
25  
26  
27  
28  
29  
30  
31  
32  
33  
34  
35  
36  
37  
38  
39  
40  
41  
42  
43  
44  
45  
46  
47  
48  
49  
50  
51  
52  
53  
54  
55  
56  
57  
58  
59  
60

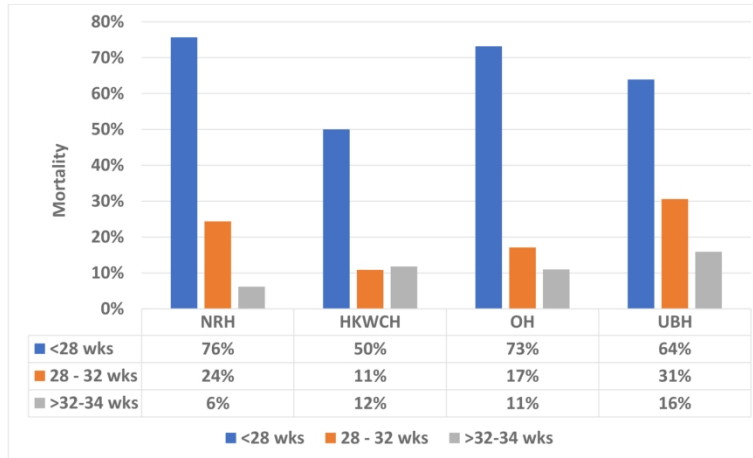

Note: RSCM/NRH: Ciptomangunkusumo Hospital (National Referral Hospital); HKWCH: Harapan Kita Women and Children Hospital (Health Centre); UBH: University Based Hospital; OH: Other Hospital.

148x105mm (600 x 600 DPI)



Supplementary Table. Incidence of ROP in Indonesia based on the birth weight in 2005-2017

| Variable                        |   | Inborn infants BW <1000 gram |           |       |      |     |              | Inborn infants BW 1000-1500 gram |           |       |      |      |              | Inborn infants BW >1500-2000 gram |           |       |      |      |              |
|---------------------------------|---|------------------------------|-----------|-------|------|-----|--------------|----------------------------------|-----------|-------|------|------|--------------|-----------------------------------|-----------|-------|------|------|--------------|
|                                 |   | 2005-2015                    | 2016-2017 |       |      |     |              | 2005-2015                        | 2016-2017 |       |      |      |              | 2005-2015                         | 2016-2017 |       |      |      |              |
|                                 |   | HKWCH                        | RSCM      | HKWCH | UBH  | OH  | All Hospital | HKWCH                            | RSCM      | HKWCH | UBH  | OH   | All Hospital | HKWCH                             | RSCM      | HKWCH | UBH  | OH   | All Hospital |
| <b>Total (Inborn)</b>           | n | 182                          | 132       | 71    | 1024 | 361 | 1588         | 437                              | 306       | 160   | 2104 | 1094 | 3664         | 748                               | 475       | 236   | 3730 | 2055 | 6496         |
| <b>Died</b>                     | n | 85                           | 101       | 38    | 567  | 256 | 962          | 72                               | 93        | 24    | 640  | 346  | 1103         | .                                 | 42        | 24    | 532  | 205  | 803          |
|                                 | % | 47                           | 77        | 54    | 55   | 71  | 61           | 16                               | 30        | 15    | 30   | 32   | 30           | .                                 | 9         | 10    | 14   | 10   | 12           |
| <b>Survived</b>                 | n | 97                           | 31        | 33    | 457  | 105 | 626          | 365                              | 213       | 136   | 1464 | 748  | 2561         | .                                 | 433       | 212   | 3198 | 1850 | 5693         |
| <b>Screened</b>                 | n | 59                           | 26        | 29    | 197  | 35  | 287          | 252                              | 169       | 123   | 802  | 273  | 1413         | 163                               | 177       | 54    | 1131 | 495  | 1857         |
| <b>Screened/Survived</b>        | % | 61                           | 84        | 88    | 43   | 33  | 46           | 69                               | 79        | 90    | 55   | 36   | 55           | .                                 | 41        | 25    | 35   | 27   | 33           |
| <b>No ROP</b>                   | n | 27                           | 24        | 26    | 156  | 28  | 234          | 172                              | 167       | 120   | 696  | 265  | 1248         | 139                               | 175       | 53    | 488  | 492  | 1208         |
| <b>ROP 1-2</b>                  | n | 22                           | 2         | 2     | 33   | 5   | 42           | 71                               | 1         | 3     | 89   | 7    | 100          | 22                                | 1         | 1     | 54   | 2    | 58           |
| <b>ROP 3-5</b>                  | n | 10                           | 0         | 1     | 6    | 2   | 9            | 9                                | 1         | 0     | 17   | 1    | 19           | 2                                 | 1         | 0     | 0    | 1    | 2            |
| <b>Prevalence of Any ROP</b>    | % | 54                           | 8         | 10    | 20   | 20  | 18           | 32                               | 1         | 2     | 13   | 3    | 8            | 15                                | 1         | 2     | 5    | 1    | 3            |
| <b>Prevalence of Severe ROP</b> | % | 17                           | 0         | 3     | 3    | 6   | 3            | 4                                | 1         | 0     | 2    | 0    | 1            | 1                                 | 1         | 0     | 0    | 0    | 0            |

Note: RSCM/NRH: Ciptomangunkusumo Hospital (National Referral Hospital); HKWCH: Harapan Kita Women and Children Hospital (National Centre for Women and Children's Health); UBH: University Based Hospital; OH: Other Hospital; All: All Hospital; ROP; Retinopathy of Prematurity; BW: Birth weight.

# BMJ Paediatrics Open

## A multicentre survey of retinopathy of prematurity in Indonesia

|                               |                                                                                                                                                                                                                                                                                                                                                                                                                                                                                                                                                                                                                                                                                                                                                                                                                                                                                                                                                            |
|-------------------------------|------------------------------------------------------------------------------------------------------------------------------------------------------------------------------------------------------------------------------------------------------------------------------------------------------------------------------------------------------------------------------------------------------------------------------------------------------------------------------------------------------------------------------------------------------------------------------------------------------------------------------------------------------------------------------------------------------------------------------------------------------------------------------------------------------------------------------------------------------------------------------------------------------------------------------------------------------------|
| Journal:                      | <i>BMJ Paediatrics Open</i>                                                                                                                                                                                                                                                                                                                                                                                                                                                                                                                                                                                                                                                                                                                                                                                                                                                                                                                                |
| Manuscript ID                 | bmjpo-2020-000761.R2                                                                                                                                                                                                                                                                                                                                                                                                                                                                                                                                                                                                                                                                                                                                                                                                                                                                                                                                       |
| Article Type:                 | Original research                                                                                                                                                                                                                                                                                                                                                                                                                                                                                                                                                                                                                                                                                                                                                                                                                                                                                                                                          |
| Date Submitted by the Author: | 20-Sep-2020                                                                                                                                                                                                                                                                                                                                                                                                                                                                                                                                                                                                                                                                                                                                                                                                                                                                                                                                                |
| Complete List of Authors:     | <p>Siswanto, J; Rumah Sakit Anak dan Bunda Harapan Kita, Dep. Neonatology; Pelita Harapan University Faculty of Medicine, Pediatric<br/>         Bos, Arend F.; University Medical Center Groningen Intensive Care Medicine, Neonatology<br/>         Dijk, Peter; Universitair Medisch Centrum Groningen, Neonatology<br/>         Rohsiswatmo, Rinawati ; University of Indonesia Faculty of Medicine, Pediatric<br/>         Irawan, Gatot; Dr Kariadi General Hospital Medical Center, Pediatric<br/>         Sulistijono, Eko; Dr Saiful Anwar General Hospital, Pediatric<br/>         Sianturi, Pertin; University of Sumatera Utara Faculty of Medicine, Pediatric<br/>         Wisnumurti, Dewi; University of Riau Faculty of Medicine, Pediatric<br/>         Wilar, Rocky; Sam Ratulangi University Faculty of Medicine, Pediatric<br/>         Sauer, Pieter; Universitair Medisch Centrum Groningen, Neonatology Study Group, The IMSROP</p> |
| Keywords:                     | Neonatology, Ophthalmology, Epidemiology, Mortality, Health services research                                                                                                                                                                                                                                                                                                                                                                                                                                                                                                                                                                                                                                                                                                                                                                                                                                                                              |
|                               |                                                                                                                                                                                                                                                                                                                                                                                                                                                                                                                                                                                                                                                                                                                                                                                                                                                                                                                                                            |

SCHOLARONE™  
Manuscripts

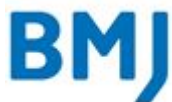

I, the Submitting Author has the right to grant and does grant on behalf of all authors of the Work (as defined in the below author licence), an exclusive licence and/or a non-exclusive licence for contributions from authors who are: i) UK Crown employees; ii) where BMJ has agreed a CC-BY licence shall apply, and/or iii) in accordance with the terms applicable for US Federal Government officers or employees acting as part of their official duties; on a worldwide, perpetual, irrevocable, royalty-free basis to BMJ Publishing Group Ltd ("BMJ") its licensees and where the relevant Journal is co-owned by BMJ to the co-owners of the Journal, to publish the Work in this journal and any other BMJ products and to exploit all rights, as set out in our [licence](#).

The Submitting Author accepts and understands that any supply made under these terms is made by BMJ to the Submitting Author unless you are acting as an employee on behalf of your employer or a postgraduate student of an affiliated institution which is paying any applicable article publishing charge ("APC") for Open Access articles. Where the Submitting Author wishes to make the Work available on an Open Access basis (and intends to pay the relevant APC), the terms of reuse of such Open Access shall be governed by a Creative Commons licence – details of these licences and which [Creative Commons](#) licence will apply to this Work are set out in our licence referred to above.

Other than as permitted in any relevant BMJ Author's Self Archiving Policies, I confirm this Work has not been accepted for publication elsewhere, is not being considered for publication elsewhere and does not duplicate material already published. I confirm all authors consent to publication of this Work and authorise the granting of this licence.

1  
2  
3 **Title:** A multicentre survey of retinopathy of prematurity in Indonesia  
4  
5  
6

7 **First Author/Corresponding Author:** J. Edy Siswanto

8 **Corresponding Author's Institution:**

9  
10 Department of Neonatology, Harapan Kita Women and Children's Hospital  
11  
12

13 **Postal Address:**

14  
15 Rumah Sakit Anak dan Bunda Harapan Kita

16  
17 Jl. Letjen S. Parman Kav. 87

18  
19 Jakarta Barat, DKI Jakarta, ID 11420

20  
21 Indonesia  
22

23 **Email:** edyjo15@yahoo.com, edy.jos@gmail.com

24  
25 **Telephone number:** +62215668284 and +6287786293779

26  
27 **Fax number:** +62215657547

28  
29 **Keywords:** Retinopathy of Prematurity, incidence, mortality

30  
31 **Word count:** 2239

32  
33 **Running title:** Incidence of ROP, mortality, Indonesia  
34  
35  
36  
37  
38  
39  
40  
41  
42  
43  
44  
45  
46  
47  
48  
49  
50  
51  
52  
53  
54  
55  
56  
57  
58  
59  
60

## A multicentre survey of retinopathy of prematurity in Indonesia

J. Edy Siswanto<sup>1a, b</sup>, Arend F. Bos<sup>2</sup>,  
Peter Dijk<sup>2</sup>, Rinawati Rohsiswatmo<sup>3</sup>, Gatot Irawan<sup>4</sup>, Eko Sulistijono<sup>5</sup>, Pertin Sianturi<sup>6</sup>,  
Dewi A. Wisnumurti<sup>7</sup>, Rocky Wilar<sup>8</sup>,  
Pieter JJ Sauer<sup>2</sup>, for the IMSROP study group\*

### Author information

<sup>1a</sup>Neonatology Working Group, Department of Pediatrics, Harapan Kita Women and Children's Hospital, Jakarta, Indonesia

<sup>1b</sup>Faculty of Medicine, Pelita Harapan University, Tangerang

<sup>2</sup>Department of Pediatrics, Beatrix Children's Hospital, University Medical Center Groningen, Groningen, The Netherlands

<sup>3</sup>Department of Pediatrics, Faculty of Medicine, University of Indonesia, Rumah Sakit Cipto Mangunkusumo, Jakarta

<sup>4</sup>Department of Pediatrics, Faculty of Medicine, Diponegoro University, RSUP Dr Kariadi, Semarang, Central Java

<sup>5</sup>Department of Pediatrics, RSUD Dr Syaiful Anwar, Faculty of Medicine, Brawijaya University Malang, East Java

<sup>6</sup>Department of Pediatrics, Faculty of Medicine, University Sumatera Utara (USU), RSUP H. Adam Malik, Medan, North Sumatera

<sup>7</sup>Department of Pediatrics, RSUD Arifin Achmad Pekanbaru, Faculty of Medicine, Riau University

<sup>8</sup>Department of Pediatrics, RSUP Prof. Dr RD Kandou Hospital, Faculty of Medicine, Sam Ratulangi University, Manado, North Sulawesi

### Abstract

**Background** The incidence of retinopathy of prematurity (ROP) is higher in Indonesia than in high-income countries. In order to reduce the incidence of the disease, a protocol on preventing, screening, and treating ROP was published in Indonesia in 2010. To assist the practical implementation of the protocol, meetings were held in all Indonesia regions, calling attention to the high incidence of ROP and the methods to reduce it. In addition, national health insurance was introduced in 2014, making ROP screening and treatment accessible to more infants.

1  
2  
3 **Objective** To evaluate whether the introduction of both the guideline drawing attention to  
4 the high incidence of ROP and national health insurance may have influenced the incidence  
5 of the disease in Indonesia.  
6  
7  
8  
9

10 **Setting** Data were collected from 34 hospitals with different levels of care: national referral  
11 centers, university-based hospitals, and public and private hospitals.  
12  
13  
14

15 **Methods:** A survey was administered with questions on admission numbers, mortality rates,  
16 ROP incidence, and its stages for 2016-2017 in relation to gestational age and birth weight.  
17  
18  
19

20 **Results** We identified 12,115 eligible infants with a gestational age of less than 34 weeks.  
21 Mortality was 24% and any-stage ROP 6.7%. The mortality in infants aged less than 28 weeks  
22 was 67%, the incidence of all-stage ROP 18%, and severe ROP 4%. In the 28-32 week group,  
23 the mortality was 24%, all-stage ROP 7%, and severe ROP 4-5%. Both mortality and the  
24 incidence of ROP were highest in university-based hospitals.  
25  
26  
27  
28  
29  
30  
31

32 **Conclusions** In the 2016-2017 period, the infant mortality rate before 32 weeks of age was  
33 higher in Indonesia than in high-income countries, but the incidence of ROP was comparable.  
34 This incidence is likely an underestimation due to the high mortality rate. The ROP incidence  
35 in 2016-2017 is lower than in surveys conducted before 2015. This decline is likely due to a  
36 higher practitioner awareness about ROP and national health insurance implementation in  
37 Indonesia.  
38  
39  
40  
41  
42  
43  
44  
45  
46  
47  
48  
49

## 50 **Introduction**

51  
52 Studies on the incidence of retinopathy of prematurity (ROP) during the period 2005-2015 in  
53 Indonesia showed a relatively high incidence of ROP.<sup>1, 2</sup> ROP was also seen in infants with  
54 gestational ages above 32 weeks. In view of these findings, a group of neonatologists and  
55 ophthalmologists met in 2009 and 2010 to develop a guideline for the prevention, early  
56  
57  
58  
59  
60

1  
2  
3 detection and management of ROP for neonatologists and ophthalmologists in Indonesia. The  
4  
5 national guideline, which was published in 2010, provides advice on how to prevent ROP and  
6  
7 how and when to screen newborn infants.<sup>3</sup> It recommends screening all infants born before  
8  
9 34 weeks or with a birthweight of less than 1500 g, as well as infants of higher gestational age  
10  
11 and higher birth weight who received oxygen for a prolonged period. Neonatologists and  
12  
13 paediatric ophthalmologists realized that the guideline's publication had almost no impact on  
14  
15 clinical practice. This was most likely due to a lack of knowledge about ROP among  
16  
17 paediatricians and ophthalmologists and to financial constraints in hospitals.  
18  
19  
20  
21  
22

23 After 2010, the paediatric and ophthalmologist societies in Indonesia therefore organized  
24  
25 several meetings to alert their members to the high incidence of ROP and to ways to prevent  
26  
27 the disease and perform screening procedures. In addition, national health insurance was  
28  
29 introduced in 2014, thereby increasing opportunities to treat premature infants and to  
30  
31 improve ROP screening. Care for preterm infants in Indonesia is provided by two national  
32  
33 referral centres, university-based NICUs (neonatal intensive care centres), as well as  
34  
35 governmental and private hospitals. There are marked variations among these hospitals, such  
36  
37 as patients' socioeconomic and cultural backgrounds and other demographic factors, in terms  
38  
39 of their options for caring for sick preterm infants. We do not know whether the differences  
40  
41 between hospitals resulted in a different incidence of ROP.  
42  
43  
44  
45  
46  
47

48 To evaluate whether an awareness of the high incidence of ROP and the introduction of  
49  
50 national health insurance may have reduced that incidence, we conducted a survey on the  
51  
52 incidence of the disease at Indonesian neonatal intensive care centres and local hospitals in  
53  
54 the years 2016-2017. As the incidence may differ between hospitals, we collected data from  
55  
56 all levels of hospitals that provide care for sick newborns.  
57  
58  
59  
60

## Methods

This is a survey: we collected data for the years 2016-2017 in the period from March to November 2019. Paediatricians in 47 hospitals were contacted by email and direct phone calls; 41 were willing to send us the required information. We received responses from 34 hospitals in 17 major provinces of Indonesia – 16 teaching hospitals, two of which are national referral hospitals for perinatology, and 10 government and eight private hospitals. The availability of NICU beds varied greatly across between regions because of a lack of trained neonatologists and differences in stakeholder support in the province or district where the paediatricians worked. We approached hospitals offering all levels of neonatal care, located in all the different parts of Indonesia.

The survey asked for the following data: number of inborn preterm infants, number of preterm infants who died in the perinatal period, number of infants screened for ROP, number of infants with ROP and the stage of ROP. For the sake of uniformity and to analyse all the data, we asked for inborn babies to be further categorised by gestational age and birth weight. For ROP, we used the terms mild ROP (stages 1-2) and severe ROP (stage 3 or higher). We included only inborn infants because important data such as gestational age and complications in pregnancy are often not available for outborn infants. We analysed the university-based hospitals and the district (government)/private hospitals in two separate groups. The data for the two national referral perinatal centres are shown separately. The results are described in frequencies and percentages. No advance statistical test was used for the data analysis.

## Patient involvement



1  
2  
3 Neither patients nor the public were involved in the design, execution, reporting or  
4  
5 dissemination plans for our research.  
6  
7

## 8 **Results**

9  
10  
11 We received data from the two national referral hospitals for perinatology (Harapan Kita  
12  
13 Women and Children's Health Centre and RSCM-Ciptomangunkusumo Hospital), 14  
14  
15 university-based hospital NICUs and 18 other hospitals, which included 10 government  
16  
17 hospitals and eight private hospitals (Table 1).  
18  
19

20  
21  
22 In total, we received data on 12,115 infants with a gestational age <34 weeks, 5,252 of whom  
23  
24 had a birth weight of less than 1500 g. The overall mortality of infants <34 weeks was 24.1%.  
25  
26 Almost 37% of surviving infants were screened for ROP; the incidence of all-stage ROP was  
27  
28 6.7%. The highest incidence of both mortality and ROP was found the university-based  
29  
30 hospitals (Table 1).  
31  
32

33  
34  
35 Table 2 shows the data for each hospital or group of hospitals according to gestational age.  
36  
37 The overall mortality in the group <28 weeks was 67%, with no differences between hospitals.  
38  
39 Sixty-three percent of surviving infants were screened for ROP. The rate of screening ranged  
40  
41 from 93% in one referral hospital to 42% in the 'other hospitals' group. The overall rate of  
42  
43 any-stage ROP was 18% and severe ROP 4%. The incidence of both any-stage ROP and severe  
44  
45 ROP was higher in the university-based NICUs and other hospitals than in the two national  
46  
47 centres (18 and 21% vs 4 and 8%) (Figure 1). Severe ROP was not seen in the national centres,  
48  
49 but was found in 4% and 5% of infants in the university and other hospitals respectively. The  
50  
51 same trend was found in infants born after 28-32 weeks. Overall mortality in this group was  
52  
53 24%, with the highest mortality in the university hospitals (31%), compared with 11% in one  
54  
55 of the national centres. The rate of screening in the 28-32 week group was lower than in the  
56  
57  
58  
59  
60

1  
2  
3 <28 week group (41 vs 63%) and ranged from 86% in one national centre to 19% in the 'other  
4  
5 hospitals' group. Any stage ROP was found in 7% of surviving infants, with the highest  
6  
7 incidence (11%) in university hospitals and 1-2% in other hospitals. The incidence of severe  
8  
9 ROP was 0-1% in all hospitals. The mortality in the 32-34 week group was 14% on average,  
10  
11 with no important differences between hospitals. The rate of screening in these infants was  
12  
13 32% and the prevalence of any stage ROP was 4%, with the highest incidence in university-  
14  
15 based hospitals.  
16  
17  
18  
19  
20

21 The supplementary table shows the data for each hospital or group of hospitals according to  
22  
23 birth weight. The overall mortality in the <1000 g group was 61%, with no differences between  
24  
25 groups of hospitals. Forty-six percent of surviving infants were screened for ROP; the rate of  
26  
27 screening ranged from 88% in one referral hospital to 33% in the 'other hospitals' group. The  
28  
29 overall rate of any stage ROP was 18% and severe ROP 3%. The incidence of both any stage  
30  
31 ROP and severe ROP was higher in the university-based NICUs and other hospitals than in the  
32  
33 two national centres (20% vs 8 and 10%). Severe ROP was not encountered in the national  
34  
35 centres but was seen in 3% and 6% respectively of infants in the university and other hospitals.  
36  
37  
38  
39  
40 The same trend was found in infants born with a birth weight of 1000-1500 g. Overall  
41  
42 mortality in this group was 30%, with the highest mortality in the university and other  
43  
44 hospitals (30%), compared with 15% in one of the national centres. The rate of screening in  
45  
46 the 1000-1500 g group was higher than in the <1000 g group (55% vs 46%), and ranged from  
47  
48 90% in one national centre to 36% in the 'other hospitals' group. Any-stage ROP was found in  
49  
50 8% of surviving infants, with the highest incidence (13%) in the university hospitals and 3% in  
51  
52 other hospitals. The incidence of severe ROP was 1% in all hospitals. The mortality in the  
53  
54 >1500-2000 g group was 12% on average, with no significant differences between hospitals.  
55  
56  
57  
58  
59  
60

1  
2  
3 The rate of screening in these infants was 33% and the prevalence of any stage ROP was 3%,  
4  
5  
6 with the highest incidence in university-based hospitals (5%).  
7

8  
9 In order to assess whether the screening rate may have affected the incidence of ROP found  
10  
11 in our survey, we calculated the incidence of ROP in 13 of the 34 hospitals where at least 80%  
12  
13 of infants were screened once or more (table 3). There was no difference in the rate of ROP  
14  
15 between these hospitals and the total group. In the <28 weeks group, the ROP rate at all  
16  
17 stages was 21% and 5% for severe ROP. In the 28-32 weeks group, the incidence of all ROP  
18  
19 stages was 6% and severe ROP 1%.  
20  
21  
22

## 23 24 **Discussion**

25  
26  
27 Globally, ROP is one of the hidden causes of morbidity following death-related problems such  
28  
29 as respiratory distress (asphyxia), infections and other complications that arise in small, sick  
30  
31 preterm infants. Countries with a high rate of premature births will consequently see a higher  
32  
33 number of infants affected by ROP. This situation occurs in almost all parts of the world, both  
34  
35 in high-income (HIC) and lower middle income countries (LMIC).<sup>4</sup>  
36  
37

38  
39  
40 What has been characterised as the third ROP epidemic has particularly affected countries in  
41  
42 Southeast Asia. It is clear that many cases of visual impairment due to ROP are preventable  
43  
44 through improved neonatal care, timely retinal examination and appropriate treatment.<sup>5</sup> In  
45  
46 this survey, we present data on the incidence and severity of ROP following the  
47  
48 implementation of a national guideline for the prevention, screening and treatment of ROP  
49  
50 and the introduction of national health insurance in Indonesia, one of the major regions in  
51  
52 Southeast Asia.  
53  
54  
55  
56  
57  
58  
59  
60

1  
2  
3 This survey conducted in 2016-2017 found the incidence of ROP in Indonesia in that period to  
4  
5 be much lower than the incidence we found in 2005-2015.<sup>1,2</sup> In that previous period, we found  
6  
7 in one NICU a 40% incidence of all-stage ROP in infants below 28 weeks and a 28% incidence  
8  
9 in the 28-32 week group.<sup>1</sup> Other studies from the period 2005-2015 in Indonesia found a ROP  
10  
11 incidence of 18-30% in infants born before 32 weeks and/or with a birth weight of less than  
12  
13 1500 g.<sup>2</sup> Different factors may have contributed to this marked decline in ROP. Firstly, a  
14  
15 national guideline for ROP prevention and screening was published in 2010. When we realized  
16  
17 that simply publishing this guideline did not change practices in Indonesia, several focus  
18  
19 meetings were held across the country to alert practitioners to the high incidence of ROP, the  
20  
21 methods to prevent ROP and the importance of screening.<sup>3</sup> In addition, national health  
22  
23 insurance was introduced in 2014, thereby improving opportunities for treating and screening  
24  
25 preterm infants. We cannot identify which of these factors may have had the greatest impact  
26  
27 on the decline in incidence of ROP.  
28  
29  
30  
31  
32  
33  
34

35 It is difficult to compare the incidence of ROP in Indonesia with the incidence reported in HIC.  
36  
37 A recent study from Greece showed an incidence of any stage ROP in infants <32 weeks of  
38  
39 19.7% and severe ROP 7.4%.<sup>6</sup> The EXPRESS study from Sweden found an incidence of any  
40  
41 stage ROP in infants <31 weeks of 31.9% and severe ROP 5.7%.<sup>7</sup> There is a marked difference,  
42  
43 however, between Indonesia and HIC in the type of infants cared for and their survival. In  
44  
45 Indonesia, almost no infants born after a gestational age of 26 weeks or less will survive.  
46  
47 Mortality among infants of 26-28 weeks is much higher than in HIC. In our survey, we found  
48  
49 that 67% of infants born <28 weeks died. Recent data from Sweden, England, France, the  
50  
51 Netherlands, Canada and the USA show a survival rate for infants born between 26-28 weeks  
52  
53 of 80-90%.<sup>8-18</sup> In Indonesia, only the healthier very preterm infants will survive. The incidence  
54  
55 of ROP may be lower in these infants than in the very sick newborns who died. The same may  
56  
57  
58  
59  
60

1  
2  
3 be true of infants born after 28-32 weeks. In Indonesia, we found that 24% of these infants  
4  
5 died. In HIC, that figure is less than 5%. The present data on the incidence of ROP in Indonesia  
6  
7 could be an underestimation caused by the higher death rate in Indonesia. There are more  
8  
9 reasons why our data might be an underestimation of the real incidence of ROP in Indonesia.  
10  
11 Not all hospitals in Indonesia have an ophthalmologist, and therefore not all preterm infants  
12  
13 are screened. Screening might not be according to the recommended schedule in all infants  
14  
15 so that ROP can be missed even in screened infants. Infants might be too sick to be screened,  
16  
17 and infants might not be screened after discharge.  
18  
19  
20  
21  
22

23 Studies conducted in other LMIC up to 2015 also showed a higher incidence of ROP than in  
24  
25 HIC. In addition, ROP was seen in infants with a higher gestational age and birth weight. A  
26  
27 study from the Philippines showed a ROP incidence of 14% in all infants born before 36  
28  
29 weeks.<sup>19</sup> A small study from Brunei showed a prevalence of 35% in infants with a birth weight  
30  
31 of  $1300 \pm 500$  g and a gestational age of  $29.5 \pm 2.6$  weeks.<sup>20</sup> In Thailand, a ROP incidence of  
32  
33 14% was found in infants with a mean birthweight of 1514 g and a gestational age of 31.8  
34  
35 weeks.<sup>21</sup> In India, ROP has been reported to occur in 21.7%–51.9% of low birth weight infants.  
36  
37 Most studies reported the mean birth weight of babies developing ROP to be above 1250 g  
38  
39 and the incidence of severe ROP ranging from 5.0–44.9%.<sup>22</sup> In line with our findings for the  
40  
41 period 2005-2015, these data indicate that ROP is prevalent in LMIC, including in infants with  
42  
43 a higher birthweight and gestational age. A recent paper describes the current state of ROP  
44  
45 in eight LMIC.<sup>23</sup> The incidence of ROP was not available for all countries. This incidence, mostly  
46  
47 based on smaller studies in one institution, ranged from 14% to 50%. In almost all countries,  
48  
49 infants up to 34 weeks and with a birthweight of 2000 g were screened. A study from Thailand,  
50  
51 where only infants born <30 weeks and with a birthweight of <1500 g were screened, found  
52  
53 a ROP incidence of 40%. In all countries, the screening rate was low, at <35%. The reasons  
54  
55  
56  
57  
58  
59  
60

1  
2  
3 mentioned for the high incidence of ROP was similar for all countries: a lack of awareness  
4 among paediatricians, a shortage of trained ophthalmologists and a lack of funds for  
5 screening. Almost all countries lacked oxygen delivery systems and oxygen saturation  
6 monitors. All countries fear an epidemic of blind infants as a result of ROP. In our view, the  
7 results of our survey indicate that it is possible to reduce the incidence of ROP, also in LMIC.  
8  
9 The first step to stop this epidemic is to be aware of the risks of ROP. This concerns all those  
10 involved in the care of preterm infants, paediatricians, ophthalmologists, nurses and  
11 administrators.  
12  
13  
14  
15  
16  
17  
18  
19  
20  
21  
22

23 Our study found that the screening rate for ROP is rather low in Indonesia, both in infants  
24 with a low gestational age and in infants with a higher gestational age who received  
25 supplemental oxygen for a prolonged period. This is most likely due to at least three factors:  
26 a lack of trained ophthalmologists, a lack of awareness among paediatricians of the  
27 importance of screening and a lack of funding for ophthalmologists. Paediatric  
28 ophthalmologists are mainly found in large academic hospitals and the national centres for  
29 perinatology. In almost all cases, there is only one paediatric ophthalmologist who is not  
30 always available. In order to increase the screening rate, paediatricians must be made aware  
31 of its importance and ophthalmologists must be trained to do it. Funds to carry out the  
32 screening need to be made available. It will not be possible to have, in a short period, enough  
33 trained ophthalmologists in Indonesia to have all preterm infants requiring ROP screening,  
34 screened according to the international accepted screening protocols. A potential solution to  
35 the lack of trained ophthalmologists might be cameras to make images of the retina and have  
36 these images evaluated by qualified, non-medical personnel. These assistants can send  
37 pictures of infants who might need ROP treatment via the internet to trained  
38 ophthalmologists. Simple, not expensive cameras have been developed. This system's  
39  
40  
41  
42  
43  
44  
45  
46  
47  
48  
49  
50  
51  
52  
53  
54  
55  
56  
57  
58  
59  
60

1  
2  
3 advantage is that time required from ophthalmologists is reduced, and pictures can also be  
4  
5 made in smaller hospitals without a trained ophthalmologist. This system is now implemented  
6  
7 in India's parts, where it has been shown to be very effective. A sensitivity of 98% is achieved  
8  
9 in detecting ROP cases that need intervention.<sup>24,25</sup>  
10  
11

12  
13 We found no difference in the incidence of ROP in the institutions with a screening rate of at  
14  
15 least 80%, compared to the whole group of infants. This indicates that a high number of  
16  
17 infants are not screened while they develop ROP. The follow-up of preterm infants admitted  
18  
19 to a NICU is low in Indonesia because of socioeconomic factors. It is not therefore known how  
20  
21 often ROP was present in surviving, unscreened infants.  
22  
23  
24

25  
26 A lack of ophthalmologists trained in ROP screening is not a problem that is unique to  
27  
28 Indonesia. There is a shortage of trained ophthalmologists in many LMIC and, where they do  
29  
30 exist, screening is often not properly reimbursed and only the most committed  
31  
32 ophthalmologists are willing to screen.<sup>26</sup>  
33  
34  
35

36  
37 In addition, paediatricians participating in this survey reported a reluctance among  
38  
39 ophthalmologists to screen because of medico-legal problems, an imbalance between the  
40  
41 level of difficulty and time spent examining very small premature babies and the results  
42  
43 obtained, and the asynchronous examination fees in different health insurance systems. This  
44  
45 all contrasts with the practice in HIC, where failure to screen an eligible infant for ROP could  
46  
47 be considered malpractice.  
48  
49  
50

51  
52 The incidence of ROP in Harapan Kita Women and Children's Hospital was significantly lower  
53  
54 in the period 2016-2017 than in the period 2005-2015. At the same time, the screening rate  
55  
56 improved to 93%. This indicates that ROP declined significantly at that hospital. In 2016, a  
57  
58 strict policy was introduced to set the oxygen saturation monitor at 91% to 95% for preterm  
59  
60

1  
2  
3 infants. The use of oxygen in the delivery room was also strictly regulated, with resuscitation  
4  
5 of preterm infants starting at 30% oxygen. CPAP was given directly after birth and continued  
6  
7 in the NICU. These measures are likely to have played an important role in reducing the  
8  
9 incidence of ROP at that NICU.  
10  
11

12  
13 The highest rate of both mortality and ROP was found in the university-based hospitals. These  
14  
15 are referral hospitals that admit mothers with antenatal complications. They may therefore  
16  
17 treat the sickest infants, sicker than those cared for in governmental and private hospitals.  
18  
19 This could explain the higher rate of mortality and ROP. At the same time, however, the two  
20  
21 national centres are also referral hospitals and they showed a lower mortality rate and a lower  
22  
23 incidence of ROP (figures 1,2). This suggests that there could be other factors behind the  
24  
25 higher incidence of ROP in the university-based hospitals. More liberal use of oxygen might  
26  
27 be a cause. More studies are needed to determine the cause of the less favourable outcome  
28  
29 in the university-based hospitals.  
30  
31  
32  
33  
34  
35

36 A limitation of this study is that the survey on the incidence of ROP as carried out in this study  
37  
38 had not been done before. As a reference in this paper, we used data from one referral  
39  
40 hospital as well as data from the literature. The rates of ROP found in one hospital in  
41  
42 Indonesia<sup>1</sup> and the studies done in other centres<sup>2</sup> all showed a high incidence of ROP in the  
43  
44 period before 2015. Therefore, we are convinced that the incidence of ROP was indeed much  
45  
46 higher than suggested by the results of this survey. A second limitation of our survey is that  
47  
48 we only included inborn infants. We do not have precise data on the ratio of inborn and  
49  
50 outborn infants for all hospitals. In the Harapan Kita Hospital, one of the national referral  
51  
52 hospitals, on average 71% of the admitted infants are inborn. We estimate that this  
53  
54 percentage will be almost the same for the university-based NICUs. Unfortunately, there is  
55  
56  
57  
58  
59  
60



1  
2  
3 no adequate neonatal transport service in Indonesia. Transportation is carried out by poorly  
4  
5 trained personnel and only 100% oxygen can be given during transport. The referring and  
6  
7 accepting neonatologists do not meet, making the transfer of information difficult and often  
8  
9 incomplete.  
10  
11

### 12 13 **Conclusion**

14  
15  
16 The incidence of ROP in preterm infants in Indonesia was lower in 2016-2017 than in the  
17  
18 period before 2015. This may be due to a higher awareness of ROP among practitioners and  
19  
20 the introduction of a national healthcare plan. Our data, however, are likely to be an  
21  
22 underestimation of the real incidence of ROP because of the higher mortality rate among  
23  
24 small premature infants in Indonesia than in HIC and a low rate of screening and follow-up of  
25  
26 surviving preterm infants.  
27  
28  
29  
30  
31  
32  
33  
34

35 **Acknowledgements** The authors would like to thank all infants and families whose data  
36  
37 contributed to the IMSROP Study Group. We wish to thank our ophthalmologists Dr  
38  
39 Habsiyah, Dr Nani H. Widodo and Dr Florence Manurung. Together with all the  
40  
41 ophthalmologists at each hospital included in this study, they were involved in examining  
42  
43 patients and providing scientific input in the field of ophthalmology. We would also like to  
44  
45 thank Prof. Rita S. Sitorus, who encouraged us to work together to reduce the incidence of  
46  
47 ROP in Indonesia in terms of neonatology, ophthalmology and public health. We also thank  
48  
49 all collaborators who are members of the IMSROP Study Group (Indonesian Multicenter  
50  
51 Retinopathy of Prematurity) for providing data in this survey so that the entire data can be  
52  
53 combined for analysis.  
54  
55  
56  
57  
58  
59  
60

## Collaborators

\*Members of the IMSROP (Indonesian Multicenter Retinopathy of Prematurity) Study Group: Rinawati Rohsiswatmo (*Rumah Sakit Cipto Mangunkusumo, Jakarta Pusat*), Tetty Yuniati (*RSUP Hasan Sadikin, Bandung, Jawa Barat*), Gatot Irawan Sarosa (*RSUP Dr Kariadi, Semarang, Jawa Tengah*), Dwi Hidayah (*RSUD Dr Moewardi, Solo, Jawa Tengah*), Dina Angelika dan Risa Etika (*RSUD Dr Soetomo Surabaya, Jawa Timur*), Eko Sulistijono (*RSUD Dr Syaiful Anwar Malang, Jawa Timur*), Made Kardana (*RSUP Sanglah, Denpasar, Bali*), Pertin Sianturi (*RSUP H. Adam Malik, Medan, Sumatera Utara*), Eni Yantri (*RSUP Dr M. Djamil Padang, Sumatera Barat*), Dewi Anggraini Wisnumurti (*RSUD Arifin Achmad Pekanbaru, Riau*), Afifa Ramadanti (*RSUP M. Hoesin Palembang, Sumatera Selatan*), Pudji Andayani (*RSUD Ulin Banjarmasin Kalimantan Selatan*), Rocky Wilar (*RSUP Prof. Dr RD Kandou Hospital, Manado*), Ema Alasiry (*RSUP Dr Wahidin Sudirohusodo, Makasar, Sulawesi Selatan*), Harris Alfian (*RS Atma Jaya, Jakarta Utara*), Johannes Edy Siswanto (*RSAB Harapan Kita dan RS Royal Taruma, Jakarta Barat*), Naomi Esthernita (*Siloam Hospital Kebon Jeruk, Jakarta Barat*), Fahrul Wakil Arbi (*RS Budi Kemuliaan, Jakarta Pusat*), Nita Dewanti (*RS Premier Bintaro, Jakarta Selatan*), Agnes Yuni Purwita Sari (*RSUP Persahabatan, Jakarta Timur*), Ellen Sianipar (*RSUD Pasar Rebo Jakarta Timur*), Robert Soetandio (*RS Awal Bros Hospital, Tangerang, Jawa Barat*), Andika Tiurmaida (*RSUD Cibinong, Jawa Barat*), Thomas Harry Adoe (*RSUD Kota Bekasi*), Muda Isa Ariantana (*Santosa Hospital Bandung Cermat Bandung, Jawa Barat*), Samad (*RSUP Dr Soeradji Tirtonegoro Klaten*), Anince (*RS Bakti Timah Karimun, Kepulauan Riau*), Tri Putri Yuliani (*RSUD Siti Aisyah Kota Lubuk Linggau*), Sumsel, Dina Frida (*RSUD Dr Sudarso, Kalimantan Barat dan RS Anugrah Bunda Khatulistiwa, Kalimantan Barat*), Nurhandini Eka Dewi (*RSUD Mataram, Nusa Tenggara Barat*), Woro Indri P. Purba (*RSUD Prof. Dr WZ Johannes Kupang, Nusa Tenggara Timur*), Sadiyah (*RSUD I Lagaligo, Luwu Timur, Sulawesi Selatan*).

**Contributors** JES is the person directly involved in all aspects of this research and manuscript.

JES, AB, PD and PJS contributed to the study design and analysis. PJS assisted in the literature review and wrote the report and the discussion section. AFB and PJS are the guarantors for the study. JES, AB and PJS had full access to the IMSROP data. All authors had full access to the summary data presented in this paper (including statistical reports and tables) and take responsibility for the integrity of the data and the accuracy of the data analysis.

**Funding** The authors have not declared a specific grant for this research from any funding agency in the public, commercial or not-for-profit sectors.

1  
2  
3 **Conflict of interests** None declared.  
4  
5

6 **Patient consent** Detail has been removed from these case descriptions to ensure anonymity.  
7

8  
9 The editors and reviewers have seen the detailed information available and are satisfied that  
10  
11 the information backs up the case the authors are making.  
12  
13

14 **Ethics approval** The study was approved by the Institutional Review Board of the University  
15  
16 of Indonesia School of Public Health (No. 32/H2.F10/PPM.00/13).  
17  
18

19  
20 **Provenance and peer review** Not commissioned; externally peer-reviewed.  
21  
22  
23  
24  
25

26 What is already known on this topic?  
27  
28

29 ▶ Several studies in the previous decade in Indonesia showed a high incidence of ROP, which  
30  
31 is a serious problem, as in other LMIC countries.  
32  
33

34  
35 ▶ The high rate of ROP in Indonesia is likely due to the expansion of neonatal intensive  
36  
37 care, whereas there is a lack of awareness of the risks of developing ROP.  
38  
39  
40

41 What does this study add?  
42  
43

44 ▶ The incidence of ROP in Indonesia was lower in 2016-2017 than in surveys  
45  
46 conducted before 2015.  
47  
48

49 ▶ There was a difference in mortality and rate of ROP between the types of hospital. Both  
50  
51 mortality and the incidence of ROP were highest in university-based hospitals.  
52  
53

54 ▶ The lower rate of ROP could be the result of a new national guideline on ROP, an  
55  
56 increased awareness following meetings and the introduction of national health care.  
57  
58  
59  
60

## References

1. Siswanto JE, Nani H Widodo NH, Sauer PJJ. *Arch Dis Child* 2018;103:619–21.
2. Siswanto JE, Sauer PJ. Retinopathy of prematurity in Indonesia: Incidence and riskfactors. *J Neonatal Perinatal Med* 2017;10:85–90.
3. Sitorus RS et al. POKJA Nasional ROP dan Bayi Prematur, Pedoman Nasional: Skrining dan Terapi ROP pada bayi prematur di Indonesia. eds 1. 2010
4. Gilbert C, Blencowe H. Retinopathy of prematurity: it is time to take action. *Comm Eye Health* 2017;99:45-48
5. Darlow BA, Gilbert CE, Quirogaet AM. Setting up and improving retinopathy of prematurity pros: interaction of neonatology, nursing and ophthalmology. *Clin Perinatol* 2013;40:215–27
6. Mataftsi A, Moutzouri S, Karagianni P, et al. Retinopathy of prematurity occurrence and evaluation of screening policy in a large tertiary Greek cohort. *Int Ophthalmol* 2020;40:385-91
7. Austeng D, Källén K, Hellström A, et al. Regional differences in screening for retinopathy of prematurity in infants born before 27 weeks of gestation in Sweden – the EXPRESS study. *Acta Ophthalmol* 2014; 92:311-5.
8. Draper ES, Zeitlin J, Field DJ, et al. Mortality patterns among very preterm babies: A comparative analysis of two European regions in France and England. *Arch Dis Child Fetal Neonatal Ed* 2007; 92: 356–360.
9. Milligan DW. Outcomes of children born very preterm in Europe. *Arch Dis Child Fetal Neonatal Ed* 2010;95:F234-40.
10. Draper ES, Zeitlin J, Fenton AC, et al, on behalf of the MOSAIC research group. Investigating the variations in survival rates for very preterm infants in 10 European regions: the MOSAIC birth cohort. *Arch Dis Child Fetal Neonatal Ed* 2009;3:F158-63.
11. Mohangoo AD, Buitendijk SE, Szamotulska K, et al. Gestational Age Patterns of Fetal and Neonatal Mortality in Europe: Results from the Euro-Peristat Project. *PLoS ONE* 2011;6:e24727.
12. Serenius F, Sjörs G, Blennow M, et al, and For the EXPRESS study group\*. EXPRESS study shows significant regional differences in 1-year outcome of extremely preterm infants in Sweden. *Acta Paediatr* 2014;103:27–37.
13. Santhakumaran S, Statnikov Y, Gray D, et al, on behalf of the Medicines for Neonates Investigator Group. Survival of very preterm infants admitted to neonatal care in England 2008–2014: time trends and regional variation. *Arch Dis Child Fetal Neonatal Ed* 2018;103:F208–F215.
14. Norman M, Hallberg B, Abrahamsson T, et al. Association Between Year of Birth and 1-Year Survival Among Extremely Preterm Infants in Sweden During 2004-2007 and 2014-2016. *JAMA* 2019; 321:1188-1199.
15. Lee SK, McMillan DD, Ohlsson A, et al. Variations in practice and outcomes in the Canadian NICU network: 1996-1997. *Pediatrics* 2000;106:1070–9.

16. Stoll BJ, Hansen NI, Bell EF, et al. Neonatal Outcomes of Extremely Preterm Infants From the NICHD Neonatal Research Network. *Pediatrics* 2010; 126: 443–456.
17. Stoll BJ, Hansen NI, Bell EF, et al. Trends in Care Practices, Morbidity, and Mortality of Extremely Preterm Neonates, 1993-2012. *JAMA* 2015;314:1039-51.
18. Su BH, Hsieh WS, Hsu CH, et al. Premature Baby Foundation of Taiwan (PBFT). Neonatal Outcomes of Extremely Preterm Infants From Taiwan: Comparison With Canada, Japan, and the USA. *Pediatr Neonatol* 2015;56:46-52.
19. Corpus K, Jimenez IV JM, Anzures R, Bascuna RI, Ventura R, Reandelar Jr M. Retinopathy of Prematurity Working Group. Proposed New Retinopathy of Prematurity Screening Criteria: Evidence for Including Older and Heavier Filipino Premature Babies. *Philipp J Ophthalmol* 2013;38:72-79.
20. Ali NAM, George J, Joshi N, et al. Prevalence of retinopathy of prematurity in Brunei Darussalam. *Int J Ophthalmol* 2013;3: 381–384.
21. Trinavarat A, Atchaneeyasakul L, Udompunteruk S. Applicability of American and British criteria for screening of retinopathy of prematurity in Thailand. *Jpn J Ophthalmol* 2004;48:50-3.
22. Dogra MR, Katoch D, Dogra M. An Update on Retinopathy of Prematurity (ROP). *Indian J Pediatr* 2017;12:930-6.
23. Bowe T, Nyamai L, Ademola-Popoola D, et al. The current state of retinopathy of prematurity in India, Kenya, Mexico, Nigeria, Philippines, Romania, Thailand, and Venezuela. *Digit J Ophthalmol* 2019;4:49–58.
24. Gilbert C, Wormald R, Fielder A, et al. Potential for a paradigm change in the detection of retinopathy of prematurity requiring treatment. *Arch Dis Child Fetal Neonatal Ed* 2016;101:F6-9.
25. Quinn GE, Vinekar A. The role of retinal photography and telemedicine in ROP screening. *Semin Perinatol* 2019;6:367-74.
26. Gilbert CE. Screening for retinopathy of prematurity: does one size fit all? *Arch Dis Child Fetal Neonatal Ed* 2016 Vol 101 No 4

#### Figure legend

Figure 1. The incidence of ROP based on gestational age in each group of hospitals in Indonesia 2016-2017.

Figure 2. Mortality based on the gestational age in each group of hospitals in Indonesia 2016-2017

**Table 1. Hospital-based ROP data surveillance in Indonesia 2016-2017 (GA ≤ 34 weeks)**

| Type of hospital      | Total hospitals | Total infants | Survived | Died |      | Screened |      | ROP |     |
|-----------------------|-----------------|---------------|----------|------|------|----------|------|-----|-----|
|                       |                 |               |          | n    | %    | n        | %    | n   | %   |
| RSCM/NRH              | 1               | 1038          | 890      | 148  | 14.3 | 392      | 44.0 | 7   | 1.8 |
| HKWCHC                | 1               | 478           | 392      | 86   | 18.0 | 281      | 71.7 | 7   | 2.5 |
| UBH                   | 14              | 6549          | 4738     | 1811 | 27.7 | 2041     | 43.1 | 197 | 9.7 |
| OH                    | 18              | 4050          | 3261     | 789  | 19.5 | 711      | 21.8 | 17  | 2.4 |
| - Government hospital | 10              | 3020          | 2425     | 595  | 19.7 | 605      | 24.9 | 15  | 2.5 |
| - Private hospital    | 8               | 1030          | 836      | 194  | 18.8 | 106      | 12.7 | 2   | 1.9 |
| All hospitals         | 34              | 12115         | 9281     | 2834 | 23.4 | 3425     | 36.9 | 228 | 6.7 |

Note: RSCM/NRH: Ciptomangunkusumo Hospital (national referral hospital); HKWCH: Harapan Kita Women and Children's Hospital (National Centre for Women and Children's Health); UBH: university-based hospital; OH: other hospital; All: all hospitals; ROP; retinopathy of prematurity.

**Table 2a. ROP incidence in Harapan Kita Women and Children's Hospital, Indonesia based on the gestational age in 2005-2017**

| Variable                        |   | Infants GA <28 wks |           | Infants GA 28 - 32 wks |           | Infants GA >32 - 34 wks |           |
|---------------------------------|---|--------------------|-----------|------------------------|-----------|-------------------------|-----------|
|                                 |   | 2005-2015          | 2016-2017 | 2005-2015              | 2016-2017 | 2005-2015               | 2016-2017 |
| <b>Total (inborn infants)</b>   | n | 185                | 54        | 569                    | 221       | NA                      | 203       |
| <b>Died</b>                     | n | 91                 | 27        | 126                    | 24        | -                       | 24        |
|                                 | % | 49                 | 50        | 22                     | 11        | -                       | 12        |
| <b>Survived</b>                 | n | 94                 | 27        | 443                    | 197       | -                       | 179       |
| <b>Screened</b>                 | n | 47                 | 25        | 261                    | 169       | 156                     | 87        |
| <b>Screened/Survived</b>        | % | 50                 | 93        | 59                     | 86        | -                       | 49        |
| <b>No ROP</b>                   | n | 28                 | 23        | 187                    | 167       | 126                     | 84        |
| <b>ROP 1-2</b>                  | n | 9                  | 2         | 66                     | 1         | 29                      | 3         |
| <b>ROP 3-5</b>                  | n | 10                 | 0         | 8                      | 1         | 1                       | 0         |
| <b>Prevalence of Any ROP</b>    | % | 40                 | 8         | 28                     | 1         | 19                      | 3         |
| <b>Prevalence of Severe ROP</b> | % | 21                 | 0         | 3                      | 1         | 1                       | 0         |

Note: ROP: Retinopathy of Prematurity; GA: gestational age; wks: weeks.

Table 2b. ROP incidence in Indonesia based on the gestational age in 2016-2017

| Variable                        |   | Infants GA <28 weeks |       |     |     |      | Infants GA 28 - 32 weeks |       |      |      |      | Infants GA >32-34 weeks |       |      |      |      |
|---------------------------------|---|----------------------|-------|-----|-----|------|--------------------------|-------|------|------|------|-------------------------|-------|------|------|------|
|                                 |   | 2016-2017            |       |     |     |      | 2016-2017                |       |      |      |      | 2016-2017               |       |      |      |      |
|                                 |   | RSCM                 | HKWCH | UBH | OH  | All  | RSCM                     | HKWCH | UBH  | OH   | All  | RSCM                    | HKWCH | UBH  | OH   | All  |
| <b>Total (inborn infants)</b>   | n | 115                  | 54    | 903 | 354 | 1426 | 501                      | 221   | 2288 | 2044 | 5054 | 422                     | 203   | 3358 | 1652 | 5635 |
| <b>Died</b>                     | n | 87                   | 27    | 577 | 259 | 961  | 122                      | 24    | 700  | 349  | 1195 | 26                      | 24    | 534  | 181  | 765  |
|                                 | % | 76                   | 50    | 64  | 73  | 67   | 24                       | 11    | 31   | 17   | 24   | 6                       | 12    | 16   | 11   | 14   |
| <b>Survived</b>                 | n | 28                   | 27    | 326 | 95  | 465  | 379                      | 197   | 1588 | 1695 | 3859 | 396                     | 179   | 2824 | 1471 | 4870 |
| <b>Screened</b>                 | n | 23                   | 25    | 204 | 40  | 292  | 187                      | 169   | 923  | 315  | 1594 | 182                     | 87    | 914  | 356  | 1539 |
| <b>Screened/Survived</b>        | % | 82                   | 93    | 63  | 42  | 63   | 49                       | 86    | 58   | 19   | 41   | 46                      | 49    | 32   | 24   | 32   |
| <b>No ROP</b>                   | n | 22                   | 23    | 161 | 33  | 239  | 185                      | 167   | 751  | 309  | 1478 | 178                     | 84    | 441  | 352  | 1480 |
| <b>ROP 1-2</b>                  | n | 1                    | 2     | 34  | 5   | 42   | 2                        | 1     | 94   | 6    | 103  | 2                       | 3     | 45   | 2    | 52   |
| <b>ROP 3-5</b>                  | n | 0                    | 0     | 9   | 2   | 11   | 0                        | 1     | 12   | 0    | 13   | 2                       | 0     | 3    | 2    | 7    |
| <b>Prevalence of Any ROP</b>    | % | 4                    | 8     | 21  | 18  | 18   | 1                        | 1     | 11   | 2    | 7    | 2                       | 3     | 5    | 1    | 3.8  |
| <b>Prevalence of Severe ROP</b> | % | 0                    | 0     | 4   | 5   | 4    | 0                        | 1     | 1    | 0    | 1    | 1                       | 0     | 0    | 1    | 0.4  |

Note: RSCM/NRH: Ciptomangunkusumo Hospital (national referral hospital); HKWCH: Harapan Kita Women and Children Hospital (National Centre for Women and Children's Health); UBH: university-based hospital; OH: other hospital; All: all hospitals; ROP; Retinopathy of Prematurity; GA: gestational age.



**Table 3. Incidence of ROP in hospitals with 80% screening coverage in Indonesia, 2016-2017**

| Variable                       |   | Birth weight |             |              |               |         | Gestational age |           |           |            |         |
|--------------------------------|---|--------------|-------------|--------------|---------------|---------|-----------------|-----------|-----------|------------|---------|
|                                |   | <1000 g      | 1000-1500 g | >1500-2000 g | >2000-<2500 g | ≥2500 g | <28 wks         | 28-32 wks | 32-34 wks | 34-<37 wks | ≥37 wks |
| <b>Total (inborn)</b>          | n | 585          | 1541        | 2679         | 4522          | 20572   | 560             | 2144      | 2319      | 3913       | 20963   |
| <b>Died</b>                    | n | 394          | 449         | 303          | 163           | 266     | 391             | 508       | 244       | 165        | 267     |
|                                | % | 67           | 29          | 11           | 4             | 1       | 70              | 24        | 11        | 4          | 1       |
| <b>Survived</b>                | n | 191          | 1092        | 2376         | 4359          | 20306   | 169             | 1636      | 2075      | 3748       | 20696   |
| <b>Screened</b>                | n | 172          | 1040        | 1033         | 1186          | 14      | 168             | 1147      | 926       | 1199       | 5       |
| <b>Screened/Survived</b>       | % | 90           | 95          | 43           | 27            | 0       | 99              | 70        | 45        | 32         | 0       |
| <b>No ROP</b>                  | n | 137          | 966         | 978          | 1159          | 14      | 132             | 1074      | 874       | 1169       | 5       |
| <b>ROP 1-2</b>                 | n | 28           | 57          | 53           | 27            | 0       | 27              | 62        | 46        | 30         | 0       |
| <b>ROP 3-5</b>                 | n | 7            | 17          | 2            | 0             | 0       | 9               | 11        | 6         | 0          | 0       |
| <b>Incidence of Any ROP</b>    | % | 20           | 7           | 5            | 2             | 0       | 21              | 6         | 6         | 3          | 0       |
| <b>Incidence of Severe ROP</b> | % | 4            | 2           | 0            | 0             | 0       | 5               | 1         | 1         | 0          | 0       |

Note: these data come from 13 of 34 hospitals; ROP: retinopathy of prematurity

1  
2  
3  
4  
5  
6  
7  
8  
9  
10  
11  
12  
13  
14  
15  
16  
17  
18  
19  
20  
21  
22  
23  
24  
25  
26  
27  
28  
29  
30  
31  
32  
33  
34  
35  
36  
37  
38  
39  
40  
41  
42  
43  
44  
45  
46  
47  
48  
49  
50  
51  
52  
53  
54  
55  
56  
57  
58  
59  
60

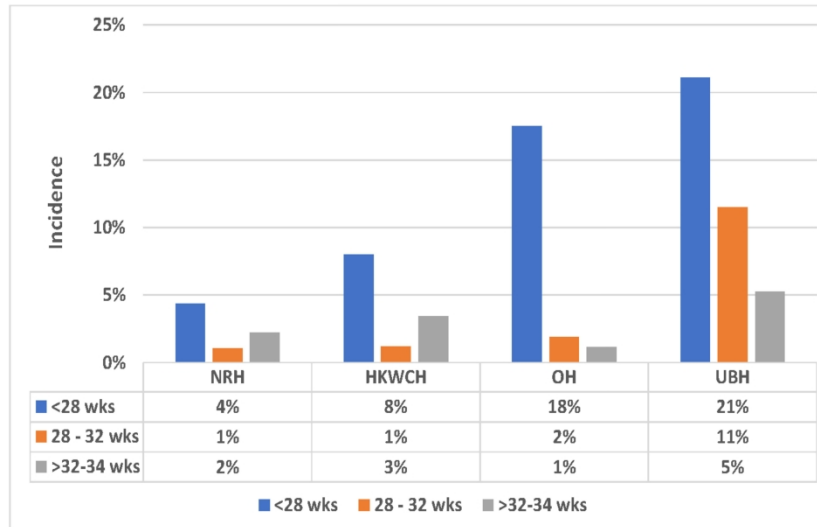

Note: NRH/RSCM: National Referral Hospital (Ciptomangunkusumo Hospital); HKWCH: Harapan Kita Women and Children Hospital (National Centre for Women and Children's Health); UBH: University Based Hospital; OH: Other Hospital; All: All Hospital; wks: weeks.

1  
2  
3  
4  
5  
6  
7  
8  
9  
10  
11  
12  
13  
14  
15  
16  
17  
18  
19  
20  
21  
22  
23  
24  
25  
26  
27  
28  
29  
30  
31  
32  
33  
34  
35  
36  
37  
38  
39  
40  
41  
42  
43  
44  
45  
46  
47  
48  
49  
50  
51  
52  
53  
54  
55  
56  
57  
58  
59  
60

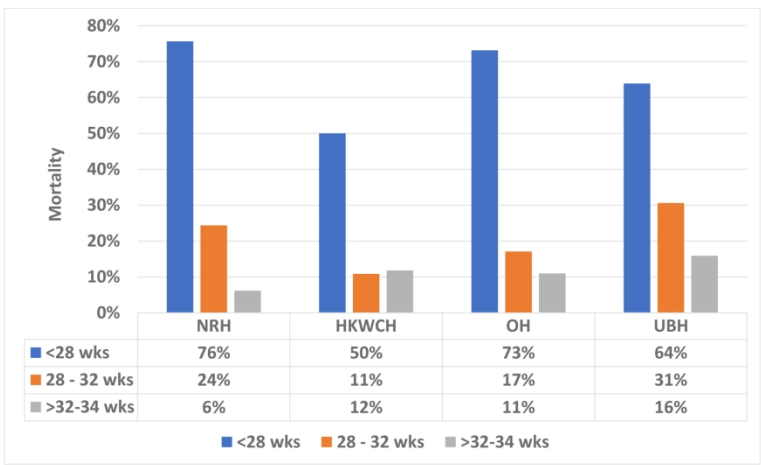

Note: RSCM/NRH: Ciptomangunkusumo Hospital (National Referral Hospital); HKWCH: Harapan Kita Women and Children Hospital (Health Centre); UBH: University Based Hospital; OH: Other Hospital.

148x105mm (1200 x 1200 DPI)

Supplementary Table. Incidence of ROP in Indonesia based on the birth weight in 2005-2017

| Variable                        |   | Inborn infants BW <1000 gram |           |       |      |     |              | Inborn infants BW 1000-1500 gram |           |       |      |      |              | Inborn infants BW >1500-2000 gram |           |       |      |      |              |
|---------------------------------|---|------------------------------|-----------|-------|------|-----|--------------|----------------------------------|-----------|-------|------|------|--------------|-----------------------------------|-----------|-------|------|------|--------------|
|                                 |   | 2005-2015                    | 2016-2017 |       |      |     |              | 2005-2015                        | 2016-2017 |       |      |      |              | 2005-2015                         | 2016-2017 |       |      |      |              |
|                                 |   | HKWCH                        | RSCM      | HKWCH | UBH  | OH  | All Hospital | HKWCH                            | RSCM      | HKWCH | UBH  | OH   | All Hospital | HKWCH                             | RSCM      | HKWCH | UBH  | OH   | All Hospital |
| <b>Total (Inborn)</b>           | n | 182                          | 132       | 71    | 1024 | 361 | 1588         | 437                              | 306       | 160   | 2104 | 1094 | 3664         | 748                               | 475       | 236   | 3730 | 2055 | 6496         |
| <b>Died</b>                     | n | 85                           | 101       | 38    | 567  | 256 | 962          | 72                               | 93        | 24    | 640  | 346  | 1103         | .                                 | 42        | 24    | 532  | 205  | 803          |
|                                 | % | 47                           | 77        | 54    | 55   | 71  | 61           | 16                               | 30        | 15    | 30   | 32   | 30           | .                                 | 9         | 10    | 14   | 10   | 12           |
| <b>Survived</b>                 | n | 97                           | 31        | 33    | 457  | 105 | 626          | 365                              | 213       | 136   | 1464 | 748  | 2561         | .                                 | 433       | 212   | 3198 | 1850 | 5693         |
| <b>Screened</b>                 | n | 59                           | 26        | 29    | 197  | 35  | 287          | 252                              | 169       | 123   | 802  | 273  | 1413         | 163                               | 177       | 54    | 1131 | 495  | 1857         |
| <b>Screened/Survived</b>        | % | 61                           | 84        | 88    | 43   | 33  | 46           | 69                               | 79        | 90    | 55   | 36   | 55           | .                                 | 41        | 25    | 35   | 27   | 33           |
| <b>No ROP</b>                   | n | 27                           | 24        | 26    | 156  | 28  | 234          | 172                              | 167       | 120   | 696  | 265  | 1248         | 139                               | 175       | 53    | 488  | 492  | 1208         |
| <b>ROP 1-2</b>                  | n | 22                           | 2         | 2     | 33   | 5   | 42           | 71                               | 1         | 3     | 89   | 7    | 100          | 22                                | 1         | 1     | 54   | 2    | 58           |
| <b>ROP 3-5</b>                  | n | 10                           | 0         | 1     | 6    | 2   | 9            | 9                                | 1         | 0     | 17   | 1    | 19           | 2                                 | 1         | 0     | 0    | 1    | 2            |
| <b>Prevalence of Any ROP</b>    | % | 54                           | 8         | 10    | 20   | 20  | 18           | 32                               | 1         | 2     | 13   | 3    | 8            | 15                                | 1         | 2     | 5    | 1    | 3            |
| <b>Prevalence of Severe ROP</b> | % | 17                           | 0         | 3     | 3    | 6   | 3            | 4                                | 1         | 0     | 2    | 0    | 1            | 1                                 | 1         | 0     | 0    | 0    | 0            |

Note: RSCM/NRH: Ciptomangunkusumo Hospital (National Referral Hospital); HKWCH: Harapan Kita Women and Children Hospital (National Centre for Women and Children's Health); UBH: University Based Hospital; OH: Other Hospital; All: All Hospital; ROP; Retinopathy of Prematurity; BW: Birth weight.
