# Supplementary material for: Multicentre survey of retinopathy of prematurity in Indonesia
Source: PubMed Central journal article supplement (PMC7831712; doi:10.1136/bmjpo-2020-000761), 2021-01-22
Supplement: bmjpo-2020-000761supp001.pdf [file bmjpo-2020-000761supp001.pdf]

Supplementary Table. Incidence of ROP in Indonesia based on the birth weight in 2005-2017

| Variable                        |   | Inborn infants BW <1000 gram |           |       |      |     |              | Inborn infants BW 1000-1500 gram |           |       |      |      |              | Inborn infants BW >1500-2000 gram |           |       |      |      |              |
|---------------------------------|---|------------------------------|-----------|-------|------|-----|--------------|----------------------------------|-----------|-------|------|------|--------------|-----------------------------------|-----------|-------|------|------|--------------|
|                                 |   | 2005-2015                    | 2016-2017 |       |      |     |              | 2005-2015                        | 2016-2017 |       |      |      |              | 2005-2015                         | 2016-2017 |       |      |      |              |
|                                 |   | HKWCH                        | RSCM      | HKWCH | UBH  | OH  | All Hospital | HKWCH                            | RSCM      | HKWCH | UBH  | OH   | All Hospital | HKWCH                             | RSCM      | HKWCH | UBH  | OH   | All Hospital |
| <b>Total (Inborn)</b>           | n | 182                          | 132       | 71    | 1024 | 361 | 1588         | 437                              | 306       | 160   | 2104 | 1094 | 3664         | 748                               | 475       | 236   | 3730 | 2055 | 6496         |
| <b>Died</b>                     | n | 85                           | 101       | 38    | 567  | 256 | 962          | 72                               | 93        | 24    | 640  | 346  | 1103         | .                                 | 42        | 24    | 532  | 205  | 803          |
|                                 | % | 47                           | 77        | 54    | 55   | 71  | 61           | 16                               | 30        | 15    | 30   | 32   | 30           | .                                 | 9         | 10    | 14   | 10   | 12           |
| <b>Survived</b>                 | n | 97                           | 31        | 33    | 457  | 105 | 626          | 365                              | 213       | 136   | 1464 | 748  | 2561         | .                                 | 433       | 212   | 3198 | 1850 | 5693         |
| <b>Screened</b>                 | n | 59                           | 26        | 29    | 197  | 35  | 287          | 252                              | 169       | 123   | 802  | 273  | 1413         | 163                               | 177       | 54    | 1131 | 495  | 1857         |
| <b>Screened/Survived</b>        | % | 61                           | 84        | 88    | 43   | 33  | 46           | 69                               | 79        | 90    | 55   | 36   | 55           | .                                 | 41        | 25    | 35   | 27   | 33           |
| <b>No ROP</b>                   | n | 27                           | 24        | 26    | 156  | 28  | 234          | 172                              | 167       | 120   | 696  | 265  | 1248         | 139                               | 175       | 53    | 488  | 492  | 1208         |
| <b>ROP 1-2</b>                  | n | 22                           | 2         | 2     | 33   | 5   | 42           | 71                               | 1         | 3     | 89   | 7    | 100          | 22                                | 1         | 1     | 54   | 2    | 58           |
| <b>ROP 3-5</b>                  | n | 10                           | 0         | 1     | 6    | 2   | 9            | 9                                | 1         | 0     | 17   | 1    | 19           | 2                                 | 1         | 0     | 0    | 1    | 2            |
| <b>Prevalence of Any ROP</b>    | % | 54                           | 8         | 10    | 20   | 20  | 18           | 32                               | 1         | 2     | 13   | 3    | 8            | 15                                | 1         | 2     | 5    | 1    | 3            |
| <b>Prevalence of Severe ROP</b> | % | 17                           | 0         | 3     | 3    | 6   | 3            | 4                                | 1         | 0     | 2    | 0    | 1            | 1                                 | 1         | 0     | 0    | 0    | 0            |

Note: RSCM/NRH: Ciptomangunkusumo Hospital (National Referral Hospital); HKWCH: Harapan Kita Women and Children Hospital (National Centre for Women and Children's Health); UBH: University Based Hospital; OH: Other Hospital; All: All Hospital; ROP; Retinopathy of Prematurity; BW: Birth weight.
